# Supplementary material for: Exosomal miRNA-profiling of pleural effusion in lung adenocarcinoma and tuberculosis
Source: Front Surg. 2023 Jan 6;9:1050242. doi: 10.3389/fsurg.2022.1050242 (PMC9852630; doi:10.3389/fsurg.2022.1050242)
Supplement: Supplementary file 2 [file Datasheet2.xlsx]

## Sheet: up_Ca_vs_TB
#log2FC >= 0.585 #p-value cut-off <= 0.05 #q-value cut-off <= 1.00 #Gene biotype: miRNA #Condition pair: up_Ca_vs_TB Column A: Mature_ID, The ID of mature miRNA. Column B: Arm, The arm of miRNA. Column C: Mature_Acc, The accession number of mature miRNA from miRBase. Column D: Mature_Seq, The mature sequence of miRNA. Column E: Seed, The seed sequence of miRNA. Column F: Length, The length of mat…
Annotation																		DE Statistic				CPM
Mature_ID	Arm	Mature_Acc	Mature_Seq	Seed	Length	High_Confidence	Type	Canonical	Pre_ID	Pre_Acc	Pre_Seq	Pre_Locus	Family_AC	Family_ID	Clustered_miRNAs	Promoter	Primary_microRNA	log2FC	Fold_Change	p_value	q_value	Ca_CPM	TB_CPM	Ca1	Ca2	Ca3	Ca4	Ca5	Ca6	TB1	TB2	TB3	TB4	TB5	TB6
hsa-miR-4669	5p	MIMAT0019749	UGUGUCCGGGAAGUGGAGGAGG	GUGUCC	22	NO	-	non-canonical_miRNA	hsa-mir-4669	MI0017300	GCCUCCCUUCACUUCCUGGCCAUCCAGGCAUCUGUGUCUGUGUCCGGGAAGUGGAGGAGGGC	chr9:134379411-134379472(+)	-	-	4669	p1@RXRA	NM_002957	8.66507	405.925	3.3429e-06	0.00125591	4.70254	-3.96253	3.81222	17.5044	0	48.2815	20.1399	66	0	0	0	0	0	0
hsa-miR-3180-3p	3p	MIMAT0015058	UGGGGCGGAGCUUCCGGAGGCC	GGGGCG	22	Yes	Mature_miRNA	canonical_hsa-specific_miRNA	hsa-mir-3180-1	MI0014214	CAGUGCGACGGGCGGAGCUUCCAGACGCUCCGCCCCACGUCGCAUGCGCCCCGGGAAAGCGUGGGGCGGAGCUUCCGGAGGCCCCGCCCUGCUG	chr16:14911220-14911313(+)	MIPF0000894	mir-3180	3179-1,3180-1,3670-1	Unknown	Unknown	7.02247	130.009	1.90393e-05	0.00206048	4.61869	-2.40378	16.3381	1.02967	3.19995	39.1471	84.2215	4.71429	0.317552	0	0.266316	0	0	0
hsa-miR-3180-3p	3p	MIMAT0015058	UGGGGCGGAGCUUCCGGAGGCC	GGGGCG	22	Yes	Mature_miRNA	canonical_hsa-specific_miRNA	hsa-mir-3180-2	MI0014215	GCGACGGGCGGAGCUUCCAGACGCUCCGCCCCACGUCGCAUGCGCCCCGGGAAAGCGUGGGGCGGAGCUUCCGGAGGCCCCGCCCUGC	chr16:16309879-16309966(+)	MIPF0000894	mir-3180	3180-2,3179-2,3670-2	Unknown	Unknown	7.02247	130.009	1.90393e-05	0.00206048	4.61869	-2.40378	16.3381	1.02967	3.19995	39.1471	84.2215	4.71429	0.317552	0	0.266316	0	0	0
hsa-miR-3180-3p	3p	MIMAT0015058	UGGGGCGGAGCUUCCGGAGGCC	GGGGCG	22	Yes	Mature_miRNA	canonical_hsa-specific_miRNA	hsa-mir-3180-3	MI0014217	CAGUGCGACGGGCGGAGCUUCCAGACGCUCCGCCCCACGUCGCAUGCGCCCCGGGAAAGCGUGGGGCGGAGCUUCCGGAGGCCCCGCCCUGCUG	chr16:18402178-18402271(-)	MIPF0000894	mir-3180	3180-3,3179-3,3670-3	Unknown	Unknown	7.02247	130.009	1.90393e-05	0.00206048	4.61869	-2.40378	16.3381	1.02967	3.19995	39.1471	84.2215	4.71429	0.317552	0	0.266316	0	0	0
hsa-miR-3180	5p	MIMAT0018178	UGGGGCGGAGCUUCCGGAG	GGGGCG	19	NO	-	non-canonical_miRNA	hsa-mir-3180-4	MI0016408	GCUCCGCCCCACGUCGCAUGCGCCCCGGGAACGCGUGGGGCGGAGCUUCCGGAGGCCCCGCUCUGCUGCCGACCCUGUGGAGCGGAGGGUGAAGCCUCCGGAUGCCAGUCCCUCAUCGCUGGCCUGGUCGCGCUGUGGCGAAGGGGGCGGAGC	chr16:15154850-15155002(-)	MIPF0000894	mir-3180	3180-4	Unknown	Unknown	7.02247	130.009	1.90393e-05	0.00206048	4.61869	-2.40378	16.3381	1.02967	3.19995	39.1471	84.2215	4.71429	0.317552	0	0.266316	0	0	0
hsa-miR-3180	5p	MIMAT0018178	UGGGGCGGAGCUUCCGGAG	GGGGCG	19	NO	-	non-canonical_miRNA	hsa-mir-3180-5	MI0016409	GCUCCGCCCCACGUCGCAUGCGCCCCGGGAACGCGUGGGGCGGAGCUUCCGGAGGCCCCGCCCUGCUGCCGACCCUGUGGAGCGGAGGGUGAAGCCUCCGGAUGCCAGUCCCUCAUCGCUGGCCCGGUCGCGCUGUGGCGAAGGGGGCGGAGC	chr16:2135977-2136129(-)	MIPF0000894	mir-3180	3180-5,4516	Unknown	Unknown	7.02247	130.009	1.90393e-05	0.00206048	4.61869	-2.40378	16.3381	1.02967	3.19995	39.1471	84.2215	4.71429	0.317552	0	0.266316	0	0	0
hsa-miR-1269b	5p	MIMAT0019059	CUGGACUGAGCCAUGCUACUGG	UGGACU	22	NO	-	non-canonical_miRNA	hsa-mir-1269b	MI0016888	UGAGGUUUCUGGACUGAGCCAUGCUACUGGCUUCUCUGGUUCUCCAGCUUACAGAUGGCUUAUCAUGGGACCUCU	chr17:12917268-12917342(-)	-	-	1269b	Unknown	Unknown	6.88746	118.394	1.07848e-05	0.00206048	5.22334	-1.66411	0	0	0	10.4392	144.641	70.7143	0.317552	0	0	1.30237	0	0
hsa-miR-6884-5p	5p	MIMAT0027668	AGAGGCUGAGAAGGUGAUGUUG	GAGGCU	22	NO	-	non-canonical_miRNA	hsa-mir-6884	MI0022731	CCCGCAGAGGCUGAGAAGGUGAUGUUGGCUCAAGAAAGGGAGAUAGAUGGUAGCCCAUCACCUUUCCGUCUCCCCUAG	chr17:40026332-40026409(-)	-	-	6884	p1@MED24	ENST00000356271.3	6.67694	102.32	0.00146249	0.0613068	2.71441	-3.96253	13.0705	1.5445	0	18.2687	0	5.76191	0	0	0	0	0	0
hsa-miR-4732-3p	3p	MIMAT0019856	GCCCUGACCUGUCCUGUUCUG	CCCUGA	21	NO	-	non-canonical_miRNA	hsa-mir-4732	MI0017369	GAGGGAGCUGUAGAGCAGGGAGCAGGAAGCUGUGUGUGUCCAGCCCUGACCUGUCCUGUUCUGCCCCCAGCCCCUC	chr17:28861655-28861730(-)	-	-	144,451a,451b,4732	p1@MIR4732	ENST00000582320.2	6.66179	101.251	0.0014704	0.0613068	2.69926	-3.96253	25.0517	1.5445	0	0	0	11.5238	0	0	0	0	0	0
hsa-miR-483-5p	5p	MIMAT0004761	AAGACGGGAGGAAAGAAGGGAG	AGACGG	22	Yes	Mature_miRNA	canonical_conserved_miRNA	hsa-mir-483	MI0002467	GAGGGGGAAGACGGGAGGAAAGAAGGGAGUGGUUCCAUCACGCCUCCUCACUCCUCUCCUCCCGUCUUCUCCUCUC	chr11:2134134-2134209(-)	MIPF0000180	mir-483	483	p1@IGF2	ENST00000416167.2	6.32558	80.2026	0.00160196	0.0613068	8.99095	2.66537	66.9861	4.11867	7.99987	26.0981	2942.26	6.80953	6.66859	0.366643	0.532632	2.60474	27.474	0
hsa-miR-3120-5p	5p	MIMAT0019198	CCUGUCUGUGCCUGCUGUACA	CUGUCU	21	Yes	-	non-canonical_miRNA	hsa-mir-3120	MI0014136	GUCAUGUGACUGCCUGUCUGUGCCUGCUGUACAGGUGAGCGGAUGUUCUGCACAGCAAGUGUAGACAGGCAGACACAUGAC	chr1:172138808-172138888(+)	MIPF0000062	mir-214	199a-2,214,3120	p1@DNM3	ENST00000355305.5	6.04249	65.9129	0.0048749	0.107236	2.07996	-3.96253	0	0	0	24.7932	0	0	0	0	0	0	0	0
hsa-miR-6736-5p	5p	MIMAT0027373	CUGGGUGAGGGCAUCUGUGGU	UGGGUG	21	NO	-	non-canonical_miRNA	hsa-mir-6736	MI0022581	CUGAGCUGGGUGAGGGCAUCUGUGGUUUGCUGGCUGCCUCAGCUCCUCUCUACCCACAG	chr1:145850587-145850645(-)	-	-	6736	p1@PIAS3	curation	6.02783	65.2464	0.00536019	0.108767	2.0653	-3.96253	2.72301	0	0	0	23.8017	0	0	0	0	0	0	0
hsa-miR-489-3p	3p	MIMAT0002805	GUGACAUCACAUAUACGGCAGC	UGACAU	22	NO	Mature_miRNA	canonical_conserved_miRNA	hsa-mir-489	MI0003124	GUGGCAGCUUGGUGGUCGUAUGUGUGACGCCAUUUACUUGAACCUUUAGGAGUGACAUCACAUAUACGGCAGCUAAACUGCUAC	chr7:93483936-93484019(-)	MIPF0000111	mir-489	489,653	p1@CALCR	NM_001742	5.90264	59.8233	0.00627829	0.12114	1.94011	-3.96253	8.71364	2.57417	0.533325	0	10.9854	0.52381	0	0	0	0	0	0
hsa-miR-3918	5p	MIMAT0018192	ACAGGGCCGCAGAUGGAGACU	CAGGGC	21	NO	Mature_miRNA	canonical_hsa-specific_miRNA	hsa-mir-3918	MI0016424	AGGCGGUUAAGCCAUGGGACAGGGCCGCAGAUGGAGACUGCUCAAGGUCAAAGGGGUCUCCAGCUGGGACCCUGCACCUGGUUCGUAGCCCCU	chr6:158764661-158764753(-)	-	-	3918	Unknown	Unknown	5.77391	54.7167	0.00765479	0.132792	1.81138	-3.96253	0	1.02967	3.19995	0	9.15451	7.85715	0	0	0	0	0	0
hsa-miR-4488	5p	MIMAT0019022	AGGGGGCGGGCUCCGGCG	GGGGGC	18	NO	-	non-canonical_miRNA	hsa-mir-4488	MI0016849	GGUAGGGGGCGGGCUCCGGCGCUGGGACCCCACUAGGGUGGCGCCUUGGCCCCGCCCCGCCC	chr11:61508596-61508657(+)	MIPF0001623	mir-4488	4488	Unknown	Unknown	5.39214	41.9949	3.8683e-06	0.00125591	10.1655	4.77333	226.01	30.3752	187.73	5615.66	42.1107	787.81	1.90531	1.46657	0.798947	52.0947	89.4367	18.4912
hsa-miR-4787-5p	5p	MIMAT0019956	GCGGGGGUGGCGGCGGCAUCCC	CGGGGG	22	Yes	-	non-canonical_miRNA	hsa-mir-4787	MI0017434	CGGUCCAGACGUGGCGGGGGUGGCGGCGGCAUCCCGGACGGCCUGUGAGGGAUGCGCCGCCCACUGCCCCGCGCCGCCUGACCG	chr3:50675080-50675163(+)	-	-	4787	p1@MIR4787	NM_004947	5.31375	39.7739	0.0153921	0.152615	1.35122	-3.96253	0	0	0	13.7015	0	1.04762	0	0	0	0	0	0
hsa-miR-4648	5p	MIMAT0019710	UGUGGGACUGCAAAUGGGAG	GUGGGA	20	NO	-	non-canonical_miRNA	hsa-mir-4648	MI0017275	UGUGGGACUGCAAAUGGGAGCUCAGCACCUGCCUGCCACCCACGCAGACCAGCCCCUGCUCUGUUCCCACAG	chr7:2527074-2527145(+)	-	-	4648	p1@LFNG	ENST00000222725.5	5.22558	37.4158	0.0183601	0.161193	1.26305	-3.96253	0.544603	1.02967	1.06665	0	10.9854	1.57143	0	0	0	0	0	0
hsa-miR-4436a	5p	MIMAT0018952	GCAGGACAGGCAGAAGUGGAU	CAGGAC	21	NO	-	non-canonical_miRNA	hsa-mir-4436a	MI0016776	GCCUCACUUUUCCACUUAUGCCUGCCCUGCCCCUCGAAUCUGCUCCACGAUUUGGGCAGGACAGGCAGAAGUGGAUAAGUGAGGA	chr2:88812370-88812454(+)	MIPF0001236	mir-4436	4436a	Unknown	Unknown	4.94579	30.8199	0.0289596	0.202925	0.983259	-3.96253	0	0	0	1.95736	10.9854	0	0	0	0	0	0	0
hsa-miR-3196	5p	MIMAT0015080	CGGGGCGGCAGGGGCCUC	GGGGCG	18	NO	-	non-canonical_miRNA	hsa-mir-3196	MI0014241	GGGUGGGGGCGGGGCGGCAGGGGCCUCCCCCAGUGCCAGGCCCCAUUCUGCUUCUCUCCCAGCU	chr20:63238779-63238842(+)	-	-	3196	p1@BIRC7	NM_139317	4.92658	30.4123	0.0261304	0.194923	0.964055	-3.96253	0	0.514834	1.06665	0	1.8309	7.85715	0	0	0	0	0	0
hsa-miR-933	5p	MIMAT0004976	UGUGCGCAGGGAGACCUCUCCC	GUGCGC	22	NO	Mature_miRNA	canonical_conserved_miRNA	hsa-mir-933	MI0005755	ACUUGGGUCAGUUCAGAGGUCCUCGGGGCGCGCGUCGAGUCAGCCGUGUGCGCAGGGAGACCUCUCCCACCCACAGU	chr2:175167633-175167709(-)	MIPF0000505	mir-933	933	p1@ATF2	ENST00000409635.1	4.92585	30.397	0.00666264	0.122442	1.90905	-3.0168	6.53523	0	1.59997	0	12.8163	2.09524	0	0	0.266316	0	0	0
hsa-miR-3195	5p	MIMAT0015079	CGCGCCGGGCCCGGGUU	GCGCCG	17	NO	-	non-canonical_miRNA	hsa-mir-3195	MI0014240	CCGCAGCCGCCGCGCCGGGCCCGGGUUGGCCGCUGACCCCCGCGGGGCCCCCGGCGGCCGGGGCGGGGGCGGGGGCUGCCCCGG	chr20:62064802-62064885(+)	-	-	3195	Unknown	Unknown	4.91652	30.2009	0.00524481	0.10869	3.00093	-1.91559	1.63381	0	0	35.2324	0	10.4762	0	0	0.532632	0	0.584554	0
hsa-miR-2113	5p	MIMAT0009206	AUUUGUGCUUGGCUCUGUCAC	UUUGUG	21	NO	-	non-canonical_miRNA	hsa-mir-2113	MI0003939	UUUUCAAAGCAAUGUGUGACAGGUACAGGGACAAAUCCCGUUAAUAAGUAAGAGGAUUUGUGCUUGGCUCUGUCACAUGCCACUUUGAAAA	chr6:98024531-98024621(+)	-	-	2113	p@chr6:98303954..98303963,+	ENST00000607823.1	4.89063	29.6638	0.0320867	0.209748	0.928102	-3.96253	0	0	0	0	12.8163	0	0	0	0	0	0	0
hsa-miR-6815-5p	5p	MIMAT0027530	UAGGUGGCGCCGGAGGAGUCAUU	AGGUGG	23	NO	-	non-canonical_miRNA	hsa-mir-6815	MI0022660	CACUGUAGGUGGCGCCGGAGGAGUCAUUUCCCAUCACUAAUGGCUUCUCUUGCACACCCAG	chr21:45478266-45478326(+)	-	-	6815	p1@COL18A1	NM_130445	4.85057	28.8515	0.00702415	0.126695	2.46606	-2.38451	9.25825	1.02967	1.06665	0	0	20.9524	0.635103	0	0	0	0	0
hsa-miR-6860	5p	MIMAT0027622	ACUGGGCAGGGCUGUGGUGAGU	CUGGGC	22	NO	-	non-canonical_miRNA	hsa-mir-6860	MI0022707	GUUAAGCAUUGGGGAGUUUGGAGUCGGUGGGUGGAGCCAAACUGGGCAGGGCUGUGGUGAGUGAGU	chr11:67045643-67045708(+)	-	-	6860	p1@SYT12	NM_177963	4.79852	27.8291	0.0317965	0.209748	0.835991	-3.96253	5.99063	0	0	1.95736	0	2.09524	0	0	0	0	0	0
hsa-miR-6750-5p	5p	MIMAT0027400	CAGGGAACAGCUGGGUGAGCUGCU	AGGGAA	24	NO	-	non-canonical_miRNA	hsa-mir-6750	MI0022595	GCUGUCAGGGAACAGCUGGGUGAGCUGCUGCCCCAGAGGCCCAGCAGGUGUCCAGAACUCACCCUCUGCUCCCAG	chr11:64898363-64898437(-)	-	-	192,194-2,6749,6750	p1@ATG2A	ENST00000377264.3	4.7533	26.9703	0.0139035	0.144064	2.07389	-2.6794	17.4273	0	1.06665	3.91471	0	2.09524	0	0	0	0.651184	0	0
hsa-miR-4750-5p	5p	MIMAT0019887	CUCGGGCGGAGGUGGUUGAGUG	UCGGGC	22	NO	-	non-canonical_miRNA	hsa-mir-4750	MI0017389	CGCUCGGGCGGAGGUGGUUGAGUGCCGACUGGCGCCUGACCCACCCCCUCCCGCAG	chr19:49888175-49888230(+)	-	-	4750	p2@TBC1D17	ENST00000535102.2	4.74541	26.8232	0.00877139	0.132792	2.36018	-2.38522	0.544603	1.5445	4.79992	19.5736	0	3.66667	0.635103	0	0	0	0	0
hsa-miR-663b	5p	MIMAT0005867	GGUGGCCCGGCCGUGCCUGAGG	GUGGCC	22	NO	-	non-canonical_miRNA	hsa-mir-663b	MI0006336	GGUGCCGAGGGCCGUCCGGCAUCCUAGGCGGGUCGCUGCGGUACCUCCCUCCUGUCUGUGGCGGUGGGAUCCCGUGGCCGUGUUUUCCUGGUGGCCCGGCCGUGCCUGAGGUUUC	chr2:132256966-132257080(-)	MIPF0000462	mir-663	663b	p1@ANKRD30BL	NR_027020	4.63124	24.7824	0.039146	0.221078	0.668715	-3.96253	0	0	0.533325	8.48188	0	0	0	0	0	0	0	0
hsa-miR-4758-5p	5p	MIMAT0019903	GUGAGUGGGAGCCGGUGGGGCUG	UGAGUG	23	NO	-	non-canonical_miRNA	hsa-mir-4758	MI0017399	GGUGAGUGGGAGCCGGUGGGGCUGGAGUAAGGGCACGCCCGGGGCUGCCCCACCUGCUGACCACCCUCCCC	chr20:62332487-62332557(-)	-	-	4758	p1@LAMA5	NM_005560	4.61944	24.5804	0.0392674	0.221078	0.656908	-3.96253	3.26762	0	0	0	5.4927	1.04762	0	0	0	0	0	0
hsa-miR-6877-5p	5p	MIMAT0027654	AGGGCCGAAGGGUGGAAGCUGC	GGGCCG	22	NO	-	non-canonical_miRNA	hsa-mir-6877	MI0022724	AGUUCAGGGCCGAAGGGUGGAAGCUGCUGGUGCUCAUCUCAGCCUCUGCCCUUGGCCUCCCCAG	chr9:133051996-133052059(+)	-	-	6877	p1@GTF3C5	ENST00000372099.6	4.58005	23.9184	0.00272182	0.0736403	3.84685	-0.733203	47.925	1.02967	3.73327	7.17697	3.6618	22	1.27021	1.09993	0	0.651184	0	0
hsa-miR-4784	5p	MIMAT0019948	UGAGGAGAUGCUGGGACUGA	GAGGAG	20	NO	-	non-canonical_miRNA	hsa-mir-4784	MI0017429	UGACUGGGCUGAGGAGAUGCUGGGACUGAGAGUGUCAUGGUGGAGCCUCCGUCCCUGCUCAUCCUCUCCGCAUGUUG	chr2:131491160-131491236(-)	-	-	4784	p1@MZT2A	ENST00000445782.2	4.54579	23.3571	0.0436954	0.236054	0.583257	-3.96253	0	0	0	8.48188	0	0	0	0	0	0	0	0
hsa-miR-1246	5p	MIMAT0005898	AAUGGAUUUUUGGAGCAGG	AUGGAU	19	NO	-	non-canonical_miRNA	hsa-mir-1246	MI0006381	UGUAUCCUUGAAUGGAUUUUUGGAGCAGGAGUGGACACCUGACCCAAAGGAAAUCAAUCCAUAGGCUAGCAAU	chr2:176600980-176601052(-)	MIPF0000627	mir-1246	1246	Unknown	Unknown	4.50048	22.635	3.50762e-06	0.00125591	13.9569	9.45644	6543.4	1410.64	48081.9	8780.7	2391.16	28202.4	637.009	713.854	491.086	757.978	1045.18	569.761
hsa-miR-3617-5p	5p	MIMAT0017997	AAAGACAUAGUUGCAAGAUGGG	AAGACA	22	NO	Mature_miRNA	canonical_conserved_miRNA	hsa-mir-3617	MI0016007	AGGUCAUAGAAAGACAUAGUUGCAAGAUGGGAUUAGAAACCAUAUGUCUCAUCAGCACCCUAUGUCCUUUCUCUGCCCU	chr20:45705102-45705180(-)	MIPF0001477	mir-3617	3617	Unknown	Unknown	4.39682	21.0656	0.0252582	0.194923	1.7207	-2.67612	5.44603	5.14834	0.533325	0	0	7.85715	0	0	0	0.651184	0	0
hsa-miR-1294	5p	MIMAT0005884	UGUGAGGUUGGCAUUGUUGUCU	GUGAGG	22	NO	Mature_miRNA	canonical_hsa-specific_miRNA	hsa-mir-1294	MI0006356	CACCUAAUGUGUGCCAAGAUCUGUUCAUUUAUGAUCUCACCGAGUCCUGUGAGGUUGGCAUUGUUGUCUGGCAUUGUCUGAUAUACAACAGUGCCAACCUCACAGGACUCAGUGAGGUGAAACUGAGGAUUAGGAAGGUGUA	chr5:154347106-154347247(+)	MIPF0000603	mir-1294	1294	p1@GALNT10	NM_198321	4.38	20.8214	0.0003235	0.0196941	6.21427	1.83427	55.0049	15.9599	8.53319	64.5928	0	300.143	12.067	0	3.19579	5.20947	0	0
hsa-miR-3122	5p	MIMAT0014984	GUUGGGACAAGAGGACGGUCUU	UUGGGA	22	NO	-	non-canonical_miRNA	hsa-mir-3122	MI0014138	ACCAGCUCUGUUGGGACAAGAGGACGGUCUUCUUUUGGAAGGAAGACCAUCAUCUUGUCCGAAGAGAGCUGGU	chr1:212077613-212077685(+)	MIPF0001549	mir-3122	3122	p1@DTL	ENST00000542077.1	4.36823	20.6523	0.038326	0.221078	1.4166	-2.95163	2.17841	1.5445	0	0	0	11.5238	0.317552	0	0	0	0	0
hsa-miR-1224-5p	5p	MIMAT0005458	GUGAGGACUCGGGAGGUGG	UGAGGA	19	Yes	-	non-canonical_miRNA	hsa-mir-1224	MI0003764	GUGAGGACUCGGGAGGUGGAGGGUGGUGCCGCCGGGGCCGGGCGCUGUUUCAGCUCGCUUCUCCCCCCACCUCCUCUCUCCUCAG	chr3:184241405-184241489(+)	MIPF0000440	mir-1224	1224	p@chr3:183947366..183947381,+	XM_011513288.1	4.36295	20.5769	0.00226969	0.0650199	4.13387	-0.229087	20.6949	1.02967	5.86657	24.7932	25.6326	27.2381	3.49307	0	0.798947	0	0	0
hsa-miR-1306-3p	3p	MIMAT0005950	ACGUUGGCUCUGGUGGUG	CGUUGG	18	Yes	-	non-canonical_miRNA	hsa-mir-1306	MI0006443	GUGAGCAGUCUCCACCACCUCCCCUGCAAACGUCCAGUGGUGCAGAGGUAAUGGACGUUGGCUCUGGUGGUGAUGGACAGUCCGA	chr22:20086058-20086142(+)	MIPF0000531	mir-1306	1306,3618	p1@DGCR8	NM_022720	4.29794	19.6702	0.00959517	0.135445	3.3263	-0.971644	20.6949	6.69284	6.39989	11.7441	1.8309	12.0476	0.317552	0.733286	0.266316	1.30237	0	0
hsa-miR-3198	5p	MIMAT0015083	GUGGAGUCCUGGGGAAUGGAGA	UGGAGU	22	NO	-	non-canonical_miRNA	hsa-mir-3198-1	MI0014246	GACUGUGCUCUCACUGUUCACCCAGCACUAGCAGUACCAGACGGUUCUGUGGAGUCCUGGGGAAUGGAGAGAGCACAGUC	chr22:17764180-17764259(-)	MIPF0001216	mir-3198	3198-1	p1@BID	ENST00000399765.1	4.29781	19.6684	0.0387447	0.221078	1.40174	-2.89607	0.544603	2.05934	0	7.82943	5.4927	0	0	0.366643	0	0	0	0
hsa-miR-3198	5p	MIMAT0015083	GUGGAGUCCUGGGGAAUGGAGA	UGGAGU	22	NO	-	non-canonical_miRNA	hsa-mir-3198-2	MI0017335	GACUCUGCUCUCACUGUUCACCCAGCACUAGCAGUACCAGAUGGUUCUGUGGAGUCCUGGGGAAUGGAGAGAGCACAGUC	chr12:54231397-54231476(-)	MIPF0001216	mir-3198	3198-2	p1@CBX5	NM_012117	4.29781	19.6684	0.0387447	0.221078	1.40174	-2.89607	0.544603	2.05934	0	7.82943	5.4927	0	0	0.366643	0	0	0	0
hsa-miR-550a-5p	5p	MIMAT0004800	AGUGCCUGAGGGAGUAAGAGCCC	GUGCCU	23	Yes	Star_miRNA	canonical_hsa-specific_miRNA	hsa-mir-550a-1	MI0003600	UGAUGCUUUGCUGGCUGGUGCAGUGCCUGAGGGAGUAAGAGCCCUGUUGUUGUAAGAUAGUGUCUUACUCCCUCAGGCACAUCUCCAACAAGUCUCU	chr7:30289794-30289890(+)	MIPF0000334	mir-550	550a-1	p1@ZNRF2	NM_147128	4.25135	19.0452	0.00183134	0.0613068	4.63325	0.381895	26.1409	23.6824	10.6665	6.52452	32.9562	48.7143	3.81062	1.09993	0.266316	1.95355	0	0
hsa-miR-550a-5p	5p	MIMAT0004800	AGUGCCUGAGGGAGUAAGAGCCC	GUGCCU	23	Yes	Star_miRNA	canonical_hsa-specific_miRNA	hsa-mir-550a-2	MI0003601	UGAUGCUUUGCUGGCUGGUGCAGUGCCUGAGGGAGUAAGAGCCCUGUUGUUGUCAGAUAGUGUCUUACUCCCUCAGGCACAUCUCCAGCGAGUCUCU	chr7:32732981-32733077(+)	MIPF0000334	mir-550	550a-2	p1@AVL9	ENST00000404479.1	4.25135	19.0452	0.00183134	0.0613068	4.63325	0.381895	26.1409	23.6824	10.6665	6.52452	32.9562	48.7143	3.81062	1.09993	0.266316	1.95355	0	0
hsa-miR-5187-5p	5p	MIMAT0021117	UGGGAUGAGGGAUUGAAGUGGA	GGGAUG	22	Yes	-	non-canonical_miRNA	hsa-mir-5187	MI0018166	GACUAAGGGUGGGAUGAGGGAUUGAAGUGGAGCAGGAAUGCGCUUUUCUCCACUGAAUCCUCUUUUCCUCAGGUGG	chr1:161227186-161227261(+)	-	-	5187	p1@TOMM40L	ENST00000474486.1	4.22631	18.7175	0.0132312	0.141617	2.78237	-1.44394	2.17841	1.5445	7.46654	16.9638	10.9854	2.09524	1.58776	0	0	0	0	0
hsa-miR-4503	5p	MIMAT0019039	UUUAAGCAGGAAAUAGAAUUUA	UUAAGC	22	NO	-	non-canonical_miRNA	hsa-mir-4503	MI0016866	ACAAUGUAGAUAUUUAAGCAGGAAAUAGAAUUUACAUAUAAAUUUCUAUUUGUUUCUAUUUCCUGCUUAAAUAUCUACAUUGC	chr14:36952309-36952391(-)	-	-	4503	p1@SLC25A21	NM_001171170	4.20579	18.4531	0.0481055	0.24966	1.25356	-2.95223	0	5.14834	0.533325	0	0	7.85715	0.317552	0	0	0	0	0
hsa-miR-137-3p	3p	MIMAT0000429	UUAUUGCUUAAGAAUACGCGUAG	UAUUGC	23	Yes	Mature_miRNA	canonical_conserved_miRNA	hsa-mir-137	MI0000454	GGUCCUCUGACUCUCUUCGGUGACGGGUAUUCUUGGGUGGAUAAUACGGAUUACGUUGUUAUUGCUUAAGAAUACGCGUAGUCGAGGAGAGUACCAGCGGCA	chr1:98046070-98046171(-)	MIPF0000106	mir-137	137,2682	p1@MIR137HG	NR_046105.1	4.15157	17.7724	0.0482573	0.24966	1.25527	-2.8963	3.26762	1.02967	0	7.82943	1.8309	0	0	0.366643	0	0	0	0
hsa-miR-6763-5p	5p	MIMAT0027426	CUGGGGAGUGGCUGGGGAG	UGGGGA	19	Yes	-	non-canonical_miRNA	hsa-mir-6763	MI0022608	UUCUCCUGGGGAGUGGCUGGGGAGCAGACAGACCCAACCUCAUGCUCCCCGGCCUCUGCCCCCAG	chr12:132581997-132582061(+)	-	-	6763	p1@FBRSL1	NM_001142641	4.13763	17.6016	0.0484453	0.24966	1.24128	-2.89635	3.81222	0.514834	1.59997	3.91471	3.6618	0.52381	0	0.366643	0	0	0	0
hsa-miR-3187-3p	3p	MIMAT0015069	UUGGCCAUGGGGCUGCGCGG	UGGCCA	20	Yes	Mature_miRNA	canonical_hsa-specific_miRNA	hsa-mir-3187	MI0014231	GCUGGCCCUGGGCAGCGUGUGGCUGAAGGUCACCAUGUUCUCCUUGGCCAUGGGGCUGCGCGGGGCCAGC	chr19:813584-813653(+)	-	-	3187,4745	Unknown	Unknown	4.02388	16.2671	0.0230105	0.189393	2.45401	-1.56987	5.44603	1.02967	3.19995	0	5.4927	17.2857	0	0.366643	0.532632	0.651184	0	0
hsa-miR-11401	5p	MIMAT0044658	UCACGUCUGCGGCUGUCACG	CACGUC	20	NO	-	non-canonical_miRNA	hsa-mir-11401	MI0036560	CUCGCGGCUGUCACGUCUGCGGCUGUCACGUCUGCUAGGGGGUUGGGGGGUCCAGGAAGGGCAGCGAGU	chr16:87853896-87853964(+)	-	-	11401	Unknown	Unknown	4.01895	16.2115	0.00921666	0.132792	3.34074	-0.678211	19.0611	6.69284	3.19995	0	0	30.9048	0.317552	1.09993	1.59789	0	0	0
hsa-miR-1269a	5p	MIMAT0005923	CUGGACUGAGCCGUGCUACUGG	UGGACU	22	NO	Mature_miRNA	canonical_hsa-specific_miRNA	hsa-mir-1269a	MI0006406	UGGAUUGCCUAGACCAGGGAAGCCAGUUGGCAUGGCUCAGUCCAAGUCUGACCACCUGAGGAAUGCCUGGACUGAGCCGUGCUACUGGCUUCCCUGGUCUCCAGC	chr4:66276824-66276928(+)	MIPF0000984	mir-1269	1269a	p1@ENST00000443143	curation	3.9431	15.3813	0.00434387	0.103193	6.09071	2.14761	7.07984	0.514834	0	6.52452	307.591	89.0477	0	0	0	0	26.3049	0
hsa-miR-4647	5p	MIMAT0019709	GAAGAUGGUGCUGUGCUGAGGAA	AAGAUG	23	NO	-	non-canonical_miRNA	hsa-mir-4647	MI0017274	CCAGGAGGGUGAAGAUGGUGCUGUGCUGAGGAAAGGGGAUGCAGAGCCCUGCCCAGCACCACCACCUCCUAUGCUCCUGG	chr6:44254206-44254285(-)	-	-	4647	p1@SLC35B2	NM_178148	3.90349	14.9647	0.0230548	0.189393	2.45637	-1.44712	4.35682	3.60384	4.2666	11.0917	7.32361	2.09524	1.58776	0	0	0	0	0
hsa-miR-1290	5p	MIMAT0005880	UGGAUUUUUGGAUCAGGGA	GGAUUU	19	NO	-	non-canonical_miRNA	hsa-mir-1290	MI0006352	GAGCGUCACGUUGACACUCAAAAAGUUUCAGAUUUUGGAACAUUUCGGAUUUUGGAUUUUUGGAUCAGGGAUGCUCAA	chr1:18897071-18897148(-)	MIPF0000610	mir-1290	1290	p1@ALDH4A1	ENST00000290597.5	3.90344	14.9642	4.6634e-05	0.00454215	11.4757	7.57231	1283.63	121.501	9885.17	1212.91	355.195	4228.19	114.954	196.887	164.583	412.851	171.274	80.8992
hsa-miR-1255b-5p	5p	MIMAT0005945	CGGAUGAGCAAAGAAAGUGGUU	GGAUGA	22	Yes	-	non-canonical_miRNA	hsa-mir-1255b-1	MI0006435	UACGGAUGAGCAAAGAAAGUGGUUUCUUAAAAUGGAAUCUACUCUUUGUGAAGAUGCUGUGAA	chr4:36426366-36426428(-)	MIPF0000506	mir-1255	1255b-1	Unknown	Unknown	3.8813	14.7363	0.0138733	0.144064	2.98444	-0.896864	12.5259	1.02967	2.1333	0	0	30.9048	2.54041	0	0	0	0	0
hsa-miR-1255b-5p	5p	MIMAT0005945	CGGAUGAGCAAAGAAAGUGGUU	GGAUGA	22	Yes	-	non-canonical_miRNA	hsa-mir-1255b-2	MI0006436	UCUUACGGAUGAGCAAAGAAAGUGGUUUGCGCCUCAAGAAACCACUUUCUUUGCUCAUCCAUAAGGA	chr1:167998660-167998726(+)	MIPF0000506	mir-1255	1255b-2	p1@DCAF6	ENST00000432587.2	3.8813	14.7363	0.0138733	0.144064	2.98444	-0.896864	12.5259	1.02967	2.1333	0	0	30.9048	2.54041	0	0	0	0	0
hsa-miR-6767-5p	5p	MIMAT0027434	UCGCAGACAGGGACACAUGGAGA	CGCAGA	23	Yes	-	non-canonical_miRNA	hsa-mir-6767	MI0022612	UGAAAUCGCAGACAGGGACACAUGGAGAACGCCCCCACCAGUUCCCACGUGCUUCUCUUUCCGCAG	chr16:2445392-2445457(+)	-	-	6767	p1@CCNF	NM_001761	3.84271	14.3473	0.0372507	0.221078	1.85228	-1.99043	6.53523	0	0	9.13433	1.8309	3.66667	0	0	0	0.651184	0.584554	0
hsa-miR-550a-3-5p	5p	MIMAT0020925	AGUGCCUGAGGGAGUAAGAG	GUGCCU	20	Yes	Star_miRNA	canonical_hsa-specific_miRNA	hsa-mir-550a-3	MI0003762	GAUGCUUUGCUGGCUGGUGCAGUGCCUGAGGGAGUAAGAGUCCUGUUGUUGUAAGAUAGUGUCUUACUCCCUCAGGCACAUCUCCAACAAGUCUC	chr7:29680734-29680828(-)	MIPF0000334	mir-550	550a-3	p1@LOC646762	NR_024278	3.65785	12.6219	0.0103481	0.13683	3.83966	0.181809	19.0611	10.8115	6.39989	6.52452	7.32361	35.0953	3.49307	1.09993	0.798947	0.651184	0	0
hsa-miR-486-5p	5p	MIMAT0002177	UCCUGUACUGAGCUGCCCCGAG	CCUGUA	22	Yes	Mature_miRNA	canonical_conserved_miRNA	hsa-mir-486-2	MI0023622	UCCUGUACUGAGCUGCCCCGAGCUGGGCAGCAUGAAGGGCCUCGGGGCAGCUCAGUACAGGAUG	chr8:41660444-41660507(+)	MIPF0000220	mir-486	486-1,486-2	Unknown	Unknown	3.57016	11.8775	0.000108646	0.00951191	16.4976	12.9274	158723	54899.3	3335.95	33380.8	10421.5	294405	24266.4	3732.06	3587.27	3922.73	3496.8	7735.11
hsa-miR-375-3p	3p	MIMAT0000728	UUUGUUCGUUCGGCUCGCGUGA	UUGUUC	22	Yes	Mature_miRNA	canonical_conserved_miRNA	hsa-mir-375	MI0000783	CCCCGCGACGAGCCCCUCGCACAAACCGGACCUGAGCGUUUUGUUCGUUCGGCUCGCGUGAGGC	chr2:219001645-219001708(-)	MIPF0000114	mir-375	375	p@chr2:219866695..219866701,-	curation	3.5661	11.8441	0.000323516	0.0196941	9.47883	5.91273	916.566	375.314	1422.91	330.141	699.404	536.381	86.3741	5.49964	6.39158	70.3279	105.22	87.8334
hsa-miR-486-5p	5p	MIMAT0002177	UCCUGUACUGAGCUGCCCCGAG	CCUGUA	22	Yes	Mature_miRNA	canonical_conserved_miRNA	hsa-mir-486-1	MI0002470	GCAUCCUGUACUGAGCUGCCCCGAGGCCCUUCAUGCUGCCCAGCUCGGGGCAGCUCAGUACAGGAUAC	chr8:41660441-41660508(-)	MIPF0000220	mir-486	486-1,486-2	p1@ANK1	NM_020477	3.54997	11.7125	0.00011719	0.00951191	16.4873	12.9374	158629	54511.6	3334.35	32684.6	10364.7	291709	24593.4	3829.58	3632.81	3896.68	3500.31	7610.3
hsa-miR-4738-3p	3p	MIMAT0019867	UGAAACUGGAGCGCCUGGAGGA	GAAACU	22	NO	-	non-canonical_miRNA	hsa-mir-4738	MI0017376	GGUCGCAUUUCUCCUUCUUACCAGCGCGUUUUCAGUUUCAUAGGGAAGCCUUUCCAUGAAACUGGAGCGCCUGGAGGAGAAGGGGCC	chr17:75784521-75784607(-)	MIPF0001521	mir-4738	4738	p1@MIR4738	ENST00000586607.1	3.54785	11.6952	0.00873058	0.132792	4.41888	0.871034	52.2819	2.05934	3.73327	32.6226	0	36.6667	0.635103	0	1.06526	1.30237	7.5992	0
hsa-miR-6734-5p	5p	MIMAT0027369	UUGAGGGGAGAAUGAGGUGGAGA	UGAGGG	23	Yes	-	non-canonical_miRNA	hsa-mir-6734	MI0022579	AGAACUUGAGGGGAGAAUGAGGUGGAGAAGCCCAGGUUCUGAAUCCCCUUCCCUCACUCUUCUCUCAG	chr1:43364648-43364715(-)	-	-	6734	p1@ELOVL1	ENST00000413844.2	3.50454	11.3493	0.0446892	0.236561	2.05455	-1.44999	3.26762	0.514834	2.1333	10.4392	0	7.85715	1.58776	0	0	0	0	0
hsa-miR-451a	5p	MIMAT0001631	AAACCGUUACCAUUACUGAGUU	AACCGU	22	NO	Mature_miRNA	canonical_conserved_miRNA	hsa-mir-451a	MI0001729	CUUGGGAAUGGCAAGGAAACCGUUACCAUUACUGAGUUUAGUAAUGGUAAUGGUUCUCUUGCUAUACCCAGA	chr17:28861369-28861440(-)	MIPF0000148	mir-451	144,451a,451b,4732	p1@MIR4732	ENST00000582320.2	3.38621	10.4557	0.000206619	0.0154577	17.4584	14.0722	137368	106222	4737.52	37651.1	15383.2	779230	29465.6	5317.06	3081.27	11250.5	21419.8	32816.2
hsa-miR-1285-3p	3p	MIMAT0005876	UCUGGGCAACAAAGUGAGACCU	CUGGGC	22	Yes	-	non-canonical_miRNA	hsa-mir-1285-1	MI0006346	UGUAGAGAUAGGAUCUCACUUUGUUGCCCAGGCUGGUCUCAAACUCCUGGUCUGGGCAACAAAGUGAGACCUUAUCUCUACAAG	chr7:92204015-92204098(-)	MIPF0000559	mir-1285	1285-1	p1@KRIT1	NM_001013406	3.35603	10.2392	0.00198212	0.0622769	7.3398	3.98378	270.668	39.6422	28.7995	90.0384	25.6326	515.953	49.2205	2.93314	11.4516	10.4189	19.8748	0
hsa-miR-122-5p	5p	MIMAT0000421	UGGAGUGUGACAAUGGUGUUUG	GGAGUG	22	Yes	Mature_miRNA	canonical_conserved_miRNA	hsa-mir-122	MI0000442	CCUUAGCAGAGCUGUGGAGUGUGACAAUGGUGUUUGUGUCUAAACUAUCAAACGCCAUUAUCACACUAAAUAGCUACUGCUAGGC	chr18:58451074-58451158(+)	MIPF0000095	mir-122	122,122b	p@chr18:56113488..56113503,+	curation	3.24915	9.50806	0.00167055	0.0613068	16.8478	13.5987	7493.73	1985.71	14462.2	21256.9	660130	2381.24	1265.76	262.15	470.58	10243.1	28950	33241.5
hsa-miR-4732-5p	5p	MIMAT0019855	UGUAGAGCAGGGAGCAGGAAGCU	GUAGAG	23	NO	-	non-canonical_miRNA	hsa-mir-4732	MI0017369	GAGGGAGCUGUAGAGCAGGGAGCAGGAAGCUGUGUGUGUCCAGCCCUGACCUGUCCUGUUCUGCCCCCAGCCCCUC	chr17:28861655-28861730(-)	-	-	144,451a,451b,4732	p1@MIR4732	ENST00000582320.2	3.24254	9.46456	0.00495443	0.107236	6.14304	2.90051	82.7796	8.75218	7.46654	5.87207	27.4635	290.714	42.5519	0.366643	0	0.651184	0	0
hsa-miR-584-5p	5p	MIMAT0003249	UUAUGGUUUGCCUGGGACUGAG	UAUGGU	22	Yes	Mature_miRNA	canonical_conserved_miRNA	hsa-mir-584	MI0003591	UAGGGUGACCAGCCAUUAUGGUUUGCCUGGGACUGAGGAAUUUGCUGGGAUAUGUCAGUUCCAGGCCAACCAGGCUGGUUGGUCUCCCUGAAGCAAC	chr5:149062313-149062409(-)	MIPF0000533	mir-584	584	p1@SH3TC2	ENST00000511307.1	3.21588	9.2913	0.0011147	0.0542857	9.23108	6.0152	589.805	292.941	38.9327	238.798	82.3906	2361.33	115.589	7.6995	26.099	50.1412	75.4074	113.259
hsa-miR-30b-3p	3p	MIMAT0004589	CUGGGAGGUGGAUGUUUACUUC	UGGGAG	22	Yes	Star_miRNA	canonical_conserved_miRNA	hsa-mir-30b	MI0000441	ACCAAGUUUCAGUUCAUGUAAACAUCCUACACUCAGCUGUAAUACAUGGAUUGGCUGGGAGGUGGAUGUUUACUUCAGCUGACUUGGA	chr8:134800520-134800607(-)	MIPF0000005	mir-30	30d,30b	p@chr8:135844510..135844527,-	curation	2.94223	7.68601	0.030432	0.205839	4.07864	1.13641	27.7747	9.26701	17.0664	0	45.7725	2.09524	6.03348	0.733286	0	5.86065	0	0
hsa-miR-200b-5p	5p	MIMAT0004571	CAUCUUACUGGGCAGCAUUGGA	AUCUUA	22	Yes	Star_miRNA	canonical_conserved_miRNA	hsa-mir-200b	MI0000342	CCAGCUCGGGCAGCCGUGGCCAUCUUACUGGGCAGCAUUGGAUGGAGUCAGGUCUCUAAUACUGCCUGGUAAUGAUGACGGCGGAGCCCUGCACG	chr1:1167104-1167198(+)	MIPF0000019	mir-8	200b,200a,429	p@chr1:1098252..1098265,+	curation	2.91023	7.51736	0.0285114	0.201233	4.55439	1.64417	15.2489	14.9302	28.2662	22.8358	18.309	40.8572	0	0.733286	0.532632	1.30237	5.26098	11.557
hsa-miR-185-5p	5p	MIMAT0000455	UGGAGAGAAAGGCAGUUCCUGA	GGAGAG	22	Yes	Mature_miRNA	canonical_conserved_miRNA	hsa-mir-185	MI0000482	AGGGGGCGAGGGAUUGGAGAGAAAGGCAGUUCCUGAUGGUCCCCUCCCCAGGGGCUGGCUUUCCUCUGGUCCUUCCCUCCCA	chr22:20033139-20033220(+)	MIPF0000202	mir-185	185	p1@C22orf25	NM_152906	2.90172	7.47316	0.00143257	0.0613068	12.2633	9.36156	7878.22	2944.34	1130.11	2308.38	981.363	14252.3	1015.53	81.0281	228.233	525.505	763.427	1333.68
hsa-miR-1180-3p	3p	MIMAT0005825	UUUCCGGCUCGCGUGGGUGUGU	UUCCGG	22	Yes	Mature_miRNA	canonical_conserved_miRNA	hsa-mir-1180	MI0006273	GCUGCUGGACCCACCCGGCCGGGAAUAGUGCUCCUGGUUGUUUCCGGCUCGCGUGGGUGUGUCGGCGGC	chr17:19344506-19344574(-)	MIPF0000789	mir-1180	1180	p2@B9D1	ENST00000261499.4	2.87616	7.34194	0.00634304	0.12114	7.52215	4.64599	236.902	90.0959	97.0651	74.3796	173.936	430.048	20.6409	6.59957	23.7021	23.4426	27.474	48.5395
hsa-miR-320d	5p	MIMAT0006764	AAAAGCUGGGUUGAGAGGA	AAAGCU	19	NO	-	non-canonical_miRNA	hsa-mir-320d-1	MI0008190	AAAAUGUUGGCCUUCUCGUCCCAGUUCUUCCCAAAGUUGAGAAAAGCUGGGUUGAGAGGAUGAAAAGAAAAA	chr13:40727816-40727887(-)	MIPF0000163	mir-320	320d-1	Unknown	Unknown	2.85764	7.24827	0.00212964	0.0628565	10.736	7.87839	908.397	136.431	1393.58	5093.04	1640.49	1061.24	222.286	24.9317	41.8116	99.6311	288.185	736.182
hsa-miR-105-5p	5p	MIMAT0000102	UCAAAUGCUCAGACUCCUGUGGU	CAAAUG	23	Yes	Mature_miRNA	canonical_conserved_miRNA	hsa-mir-105-1	MI0000111	UGUGCAUCGUGGUCAAAUGCUCAGACUCCUGUGGUGGCUGCUCAUGCACCACGGAUGUUUGAGCAUGUGCUACGGUGUCUA	chrX:152392219-152392299(-)	MIPF0000074	mir-105	105-1,105-2,767	p1@GABRA3	ENST00000370314.4	2.84057	7.16302	0.0347333	0.21826	4.11835	1.27778	0	0.514834	4.79992	0.652452	100.7	0	4.12817	0	0	0	9.93741	0
hsa-miR-105-5p	5p	MIMAT0000102	UCAAAUGCUCAGACUCCUGUGGU	CAAAUG	23	Yes	Mature_miRNA	canonical_conserved_miRNA	hsa-mir-105-2	MI0000112	UGUGCAUCGUGGUCAAAUGCUCAGACUCCUGUGGUGGCUGCUUAUGCACCACGGAUGUUUGAGCAUGUGCUAUGGUGUCUA	chrX:152394412-152394492(-)	MIPF0000074	mir-105	105-1,105-2,767	p1@GABRA3	ENST00000370314.4	2.84057	7.16302	0.0347333	0.21826	4.11835	1.27778	0	0.514834	4.79992	0.652452	100.7	0	4.12817	0	0	0	9.93741	0
hsa-miR-196a-5p	5p	MIMAT0000226	UAGGUAGUUUCAUGUUGUUGGG	AGGUAG	22	Yes	Mature_miRNA	canonical_conserved_miRNA	hsa-mir-196a-2	MI0000279	UGCUCGCUCAGCUGAUCUGUGGCUUAGGUAGUUUCAUGUUGUUGGGAUUGAGUUUUGAACUCGGCAACAAGAAACUGCCUGAGUUACAUCAGUCGGUUUUCGUCGAGGGC	chr12:53991738-53991847(+)	MIPF0000031	mir-196	196a-2	p3@HOXC10	ENST00000513209.1	2.83631	7.14193	0.0224719	0.188686	4.98781	2.1515	5.44603	1.5445	146.664	0	34.7871	1.57143	5.71593	0	2.92947	17.582	0	0
hsa-miR-182-5p	5p	MIMAT0000259	UUUGGCAAUGGUAGAACUCACACU	UUGGCA	24	Yes	Mature_miRNA	canonical_conserved_miRNA	hsa-mir-182	MI0000272	GAGCUGCUUGCCUCCCCCCGUUUUUGGCAAUGGUAGAACUCACACUGGUGAGGUAACAGGAUCCGGUGGUUCUAGACUUGCCAACUAUGGGGCGAGGACUCAGCCGGCAC	chr7:129770383-129770492(-)	MIPF0000116	mir-182	96,182,183	p@chr7:129420052..129420074,-	curation	2.82769	7.09937	0.00206787	0.0628565	11.2185	8.39078	1515.08	1690.71	2251.7	710.521	217.877	7909.53	932.332	84.3279	116.646	248.752	410.357	220.739
hsa-miR-1299	5p	MIMAT0005887	UUCUGGAAUUCUGUGUGAGGGA	UCUGGA	22	NO	-	non-canonical_miRNA	hsa-mir-1299	MI0006359	CCUCAUGGCAGUGUUCUGGAAUCCUACGUGAGGGACAAUCAUUCAGACCCACGUAGCAGUGUUCUGGAAUUCUGUGUGAGGGA	chr9:40929010-40929092(-)	MIPF0000625	mir-1299	1299	Unknown	Unknown	2.79969	6.96293	0.0107544	0.139175	6.68674	3.88704	436.771	102.452	27.7329	0	47.6034	2.61905	7.62124	3.29979	15.7126	24.0938	9.35286	28.8926
hsa-miR-320d	5p	MIMAT0006764	AAAAGCUGGGUUGAGAGGA	AAAGCU	19	NO	-	non-canonical_miRNA	hsa-mir-320d-2	MI0008192	UAUCAAUAAGCCUUCUCUUCCCAGUUCUUCUUGGAGUCAGGAAAAGCUGGGUUGAGAGGAGCAGAAAAGAAA	chrX:140926160-140926231(-)	MIPF0000163	mir-320	320d-2	Unknown	Unknown	2.7466	6.71132	0.00308106	0.0811069	10.6336	7.88696	642.631	103.996	1395.18	4938.41	1484.86	966.429	326.761	25.665	46.0726	91.8169	289.354	641.415
hsa-miR-4429	5p	MIMAT0018944	AAAAGCUGGGCUGAGAGGCG	AAAGCU	20	NO	-	non-canonical_miRNA	hsa-mir-4429	MI0016768	AGGGAGAAAAGCUGGGCUGAGAGGCGACUGGUGUCUAAUUUGUUUGUCUCUCCAACUCAGACUGCCUGGCCCA	chr2:11540605-11540677(-)	MIPF0001474	mir-4429	4429	Unknown	Unknown	2.71585	6.56982	0.016024	0.156073	6.21209	3.49623	121.446	11.8412	31.4661	173.552	53.0961	52.9048	16.8302	0.366643	2.13053	3.25592	8.76831	36.9825
hsa-miR-196a-5p	5p	MIMAT0000226	UAGGUAGUUUCAUGUUGUUGGG	AGGUAG	22	Yes	Mature_miRNA	canonical_conserved_miRNA	hsa-mir-196a-1	MI0000238	GUGAAUUAGGUAGUUUCAUGUUGUUGGGCCUGGGUUUCUGAACACAACAACAUUAAACCACCCGAUUCAC	chr17:48632490-48632559(-)	MIPF0000031	mir-196	196a-1	p1@ENST00000433510	curation	2.63451	6.20964	0.033835	0.216811	4.85197	2.21746	5.99063	1.5445	134.931	1.3049	27.4635	1.57143	5.39838	0.366643	2.39684	14.9772	0	4.62281
hsa-miR-149-5p	5p	MIMAT0000450	UCUGGCUCCGUGUCUUCACUCCC	CUGGCU	23	Yes	Mature_miRNA	canonical_conserved_miRNA	hsa-mir-149	MI0000478	GCCGGCGCCCGAGCUCUGGCUCCGUGUCUUCACUCCCGUGCUUGUCCGAGGAGGGAGGGAGGGACGGGGGCUGUGCUGGGGCAGCUGGA	chr2:240456001-240456089(+)	MIPF0000274	mir-149	149	p1@GPC1	NM_002081	2.55819	5.88969	0.0240766	0.190887	5.90505	3.34685	20.1503	35.5235	23.4663	7.17697	270.973	4.71429	27.9446	0.733286	0	0.651184	30.9813	0
hsa-miR-432-5p	5p	MIMAT0002814	UCUUGGAGUAGGUCAUUGGGUGG	CUUGGA	23	Yes	Mature_miRNA	canonical_conserved_miRNA	hsa-mir-432	MI0003133	UGACUCCUCCAGGUCUUGGAGUAGGUCAUUGGGUGGAUCCUCUAUUUCCUUACGUGGGCCACUGGAUGGCUCCUCCAUGUCUUGGAGUAGAUCA	chr14:100884483-100884576(+)	MIPF0000211	mir-432	127,136,337,431,433,493,432,665	p1@MEG3	Gtl2-Dio3	2.52222	5.74465	0.0167545	0.157934	7.1647	4.64249	81.6904	91.6404	563.724	22.1834	75.067	25.6667	39.694	8.79943	9.85369	42.327	29.2277	19.6469
hsa-miR-10527-5p	5p	MIMAT0041997	AAAGCAAAUGUUGGGUGAACGGC	AAGCAA	23	NO	-	non-canonical_miRNA	hsa-mir-10527	MI0033674	AAAGCAAAUGUUGGGUGAACGGCUGUUUCCUCUUAUUCAAGCCAUGCACCUUACUCUUGCUGGUA	chr12:63823663-63823727(+)	-	-	10527	Unknown	Unknown	2.4881	5.61038	0.0295983	0.204459	5.73271	3.24461	105.108	43.246	43.1993	3.91471	14.6472	107.905	21.5935	3.29979	9.85369	7.81421	13.4447	0
hsa-miR-200b-3p	3p	MIMAT0000318	UAAUACUGCCUGGUAAUGAUGA	AAUACU	22	Yes	Mature_miRNA	canonical_conserved_miRNA	hsa-mir-200b	MI0000342	CCAGCUCGGGCAGCCGUGGCCAUCUUACUGGGCAGCAUUGGAUGGAGUCAGGUCUCUAAUACUGCCUGGUAAUGAUGACGGCGGAGCCCUGCACG	chr1:1167104-1167198(+)	MIPF0000019	mir-8	200b,200a,429	p@chr1:1098252..1098265,+	curation	2.48728	5.6072	0.00804668	0.132792	9.68066	7.19338	571.288	886.544	1567.44	217.919	723.206	957	115.589	72.9619	94.0095	91.1657	303.383	201.092
hsa-miR-296-3p	3p	MIMAT0004679	GAGGGUUGGGUGGAGGCUCUCC	AGGGUU	22	Yes	Star_miRNA	canonical_conserved_miRNA	hsa-mir-296	MI0000747	AGGACCCUUCCAGAGGGCCCCCCCUCAAUCCUGUUGUGCCUAAUUCAGAGGGUUGGGUGGAGGCUCUCCUGAAGGGCUCU	chr20:58817615-58817694(-)	MIPF0000159	mir-296	296,298	p1@GNAS-AS1	curation	2.46618	5.5258	0.02657	0.194923	6.04857	3.58238	74.6106	24.1972	15.9997	133.753	111.685	37.1905	53.0311	0.366643	0.798947	2.60474	14.0293	0
hsa-miR-320a-3p	3p	MIMAT0000510	AAAAGCUGGGUUGAGAGGGCGA	AAAGCU	22	Yes	-	non-canonical_miRNA	hsa-mir-320a	MI0000542	CUCCCCUCCGCCUUCUCUUCCCGGUUCUUCCCGGAGUCGGGAAAAGCUGGGUUGAGAGGGCGAAAAAGGAUG	chr8:22244966-22245037(-)	MIPF0000163	mir-320	320a	p1@MIR320A	curation	2.46239	5.5113	0.00520323	0.10869	16.0705	13.6081	144081	15624.7	26037.4	109199	51080.3	66885.3	18426.9	374.342	1238.63	2603.43	9089.81	43188.6
hsa-miR-7704	5p	MIMAT0030019	CGGGGUCGGCGGCGACGUG	GGGGUC	19	NO	-	non-canonical_miRNA	hsa-mir-7704	MI0025240	CGGGGUCGGCGGCGACGUGCUCAGCUUGGCACCCAAGUUCUGCCGCUCCGACGCCCGGC	chr2:176188843-176188901(+)	-	-	7704	p1@HOXD1	NM_024501	2.45181	5.47103	0.0167709	0.157934	7.71369	5.26188	90.9487	10.2967	29.3329	918	29.2944	180.714	5.08083	2.5665	2.13053	18.8843	108.727	93.6119
hsa-miR-3913-5p	5p	MIMAT0018187	UUUGGGACUGAUCUUGAUGUCU	UUGGGA	22	Yes	-	non-canonical_miRNA	hsa-mir-3913-1	MI0016417	UUGUUUAUAAUAAACUGAAAUAUUUGGGACUGAUCUUGAUGUCUGCCAAAACCUUGGCAGACAUCAAGAUCAGUCCCAAAUAUUUCAGUUUAUUAUAGACAG	chr12:69584722-69584823(-)	MIPF0001134	mir-3913	3913-1,3913-2	Unknown	Unknown	2.43541	5.4092	0.0384376	0.221078	5.20339	2.76797	34.31	12.8708	17.5997	22.8358	10.9854	121.524	16.5127	10.266	10.3863	2.60474	0	0
hsa-miR-3913-5p	5p	MIMAT0018187	UUUGGGACUGAUCUUGAUGUCU	UUGGGA	22	Yes	-	non-canonical_miRNA	hsa-mir-3913-2	MI0016418	UGUCUAUAAUAAACUGAAAUAUUUGGGACUGAUCUUGAUGUCUGCCAAGGUUUUGGCAGACAUCAAGAUCAGUCCCAAAUAUUUCAGUUUAUUAUAAACA	chr12:69584723-69584822(+)	MIPF0001134	mir-3913	3913-1,3913-2	Unknown	Unknown	2.43541	5.4092	0.0384376	0.221078	5.20339	2.76797	34.31	12.8708	17.5997	22.8358	10.9854	121.524	16.5127	10.266	10.3863	2.60474	0	0
hsa-miR-193b-5p	5p	MIMAT0004767	CGGGGUUUUGAGGGCGAGAUGA	GGGGUU	22	Yes	Mature_miRNA	canonical_conserved_miRNA	hsa-mir-193b	MI0003137	GUGGUCUCAGAAUCGGGGUUUUGAGGGCGAGAUGAGUUUAUGUUUUAUCCAACUGGCCCUCAAAGUCCCGCUUUUGGGGUCAU	chr16:14303967-14304049(+)	MIPF0000082	mir-193	365a,193b	p@chr16:14396121..14396145,+	XR_109259	2.39762	5.26935	0.034643	0.21826	5.8665	3.46887	47.3804	19.5637	59.199	51.5437	126.332	46.6191	20.9584	0.733286	2.92947	14.9772	11.6911	15.0241
hsa-miR-3960	5p	MIMAT0019337	GGCGGCGGCGGAGGCGGGGG	GCGGCG	20	NO	-	non-canonical_miRNA	hsa-mir-3960	MI0016964	GGCGCCCCGGCUCCCCGCGCCCCCGAUCGGGGCCGCCGCUAGUAGUGGCGGCGGCGGAGGCGGGGGCAGCGGCGGCGGCGGCGGAGGCGCC	chr9:127785833-127785923(+)	MIPF0001271	mir-3960	2861,3960	p2@CDK9	ENST00000421939.1	2.3749	5.18699	0.0422822	0.232672	5.59245	3.21755	18.5165	0	5.33325	229.663	0	35.0953	1.58776	0.733286	0.266316	1.95355	17.5366	34.6711
hsa-miR-2110	5p	MIMAT0010133	UUGGGGAAACGGCCGCUGAGUG	UGGGGA	22	NO	-	non-canonical_miRNA	hsa-mir-2110	MI0010629	CAGGGGUUUGGGGAAACGGCCGCUGAGUGAGGCGUCGGCUGUGUUUCUCACCGCGGUCUUUUCCUCCCACUCUUG	chr10:114174105-114174179(-)	MIPF0001399	mir-2110	2110	p1@C10orf118	ENST00000369285.3	2.35045	5.09984	0.0172301	0.158388	8.37207	6.02162	525.542	65.8987	125.865	339.928	117.178	812.429	42.2344	20.8986	31.6916	126.981	123.925	43.9167
hsa-miR-320e	5p	MIMAT0015072	AAAGCUGGGUUGAGAAGG	AAGCUG	18	NO	-	non-canonical_miRNA	hsa-mir-320e	MI0014234	CUCCAUGGGGCCUUCUCUUCCCAGUUCUUCCUGGAGUCGGGGAAAAGCUGGGUUGAGAAGGUGAAAAGAAAAA	chr19:46709282-46709354(-)	MIPF0000163	mir-320	320e	p1@PRKD2	ENST00000595515.1	2.30753	4.95034	0.0217164	0.183929	7.98781	5.68028	429.147	43.7609	121.065	543.493	173.936	211.095	51.7609	2.19986	7.72316	11.7213	32.1505	203.404
hsa-miR-320b	5p	MIMAT0005792	AAAAGCUGGGUUGAGAGGGCAA	AAAGCU	22	NO	-	non-canonical_miRNA	hsa-mir-320b-2	MI0003839	GUCUCUUAGGCUUUCUCUUCCCAGAUUUCCCAAAGUUGGGAAAAGCUGGGUUGAGAGGGCAAAAGGAAAAA	chr1:224257040-224257110(-)	MIPF0000163	mir-320	320b-2	p1@NVL	ENST00000482491.1	2.30104	4.92812	0.00921495	0.132792	13.3315	11.0305	16364.8	1216.55	5387.11	21643.8	9308.3	7929.96	2152.37	83.2279	177.899	527.459	1902.72	7708.53
hsa-miR-320b	5p	MIMAT0005792	AAAAGCUGGGUUGAGAGGGCAA	AAAGCU	22	NO	-	non-canonical_miRNA	hsa-mir-320b-1	MI0003776	AUAAAUUAAUCCCUCUCUUUCUAGUUCUUCCUAGAGUGAGGAAAAGCUGGGUUGAGAGGGCAAACAAAUUAA	chr1:116671746-116671817(+)	MIPF0000163	mir-320	320b-1	Unknown	Unknown	2.29877	4.9204	0.00927089	0.132792	13.3476	11.0488	16472.1	1313.86	5531.11	21658.2	9562.8	8002.77	2252.71	85.0612	181.894	546.343	1922.6	7723.56
hsa-miR-320c	5p	MIMAT0005793	AAAAGCUGGGUUGAGAGGGU	AAAGCU	20	NO	-	non-canonical_miRNA	hsa-mir-320c-2	MI0008191	GCAUGACAGGCCUUCUCUUUCCAGUUCUUCCCAGAAUUGGGAAAAGCUGGGUUGAGAGGGUAAGAAAAGAAA	chr18:24321675-24321746(+)	MIPF0000163	mir-320	320c-2	Unknown	Unknown	2.26871	4.8189	0.0108596	0.139175	11.6266	9.35788	2613.55	282.644	2745.55	7704.16	3588.57	2037.1	912.644	51.6966	90.8137	278.056	874.492	1730.09
hsa-miR-320c	5p	MIMAT0005793	AAAAGCUGGGUUGAGAGGGU	AAAGCU	20	NO	-	non-canonical_miRNA	hsa-mir-320c-1	MI0003778	AAAAAUGAGGCCUUCUCUUCCCAGUUCUUCCCAGAGUCAGGAAAAGCUGGGUUGAGAGGGUAGAAAAAAAAU	chr18:21683518-21683589(+)	MIPF0000163	mir-320	320c-1	Unknown	Unknown	2.25878	4.78588	0.0111975	0.141617	11.59	9.33117	2430.02	265.654	2722.62	7588.02	3522.65	1966.91	910.421	50.9634	89.7484	272.846	870.401	1671.15
hsa-miR-423-5p	5p	MIMAT0004748	UGAGGGGCAGAGAGCGAGACUUU	GAGGGG	23	Yes	Mature_miRNA	canonical_conserved_miRNA	hsa-mir-423	MI0001445	AUAAAGGAAGUUAGGCUGAGGGGCAGAGAGCGAGACUUUUCUAUUUUCCAAAAGCUCGGUCUGAGGCCCCUCAGUCUUGCUUCCUAACCCGCGC	chr17:30117079-30117172(+)	MIPF0000329	mir-423	423,3184	p1@NSRP1	ENST00000475652.1	2.19622	4.58276	0.0121182	0.141617	15.0174	12.8212	34113.9	4687.05	13005.7	26186.2	54522.4	66479.3	32780.9	365.91	910.001	1511.4	2674.33	5178.7
hsa-let-7b-5p	5p	MIMAT0000063	UGAGGUAGUAGGUUGUGUGGUU	GAGGUA	22	Yes	Mature_miRNA	canonical_conserved_miRNA	hsa-let-7b	MI0000063	CGGGGUGAGGUAGUAGGUUGUGUGGUUUCAGGGCAGUGAUGUUGCCCCUCGGAAGAUAACUAUACAACCUACUGCCUUCCCUG	chr22:46113686-46113768(+)	MIPF0000002	let-7	let7a-3,let7b,4763	p2@MIRLET7BHG,p4@MIR4763	NR_027033	2.12138	4.35109	0.0153781	0.152615	14.0533	11.9319	18158.7	5627.65	21392.2	9794.61	9116.06	37911.8	13703.6	384.242	614.657	1816.15	3696.72	3226.72
hsa-miR-100-5p	5p	MIMAT0000098	AACCCGUAGAUCCGAACUUGUG	ACCCGU	22	Yes	Mature_miRNA	canonical_conserved_miRNA	hsa-mir-100	MI0000102	CCUGUUGCCACAAACCCGUAGAUCCGAACUUGUGGUAUUAGUCCGCACAAGCUUGUAUCUAUAGGUAUGUGUCUGUUAGG	chr11:122152229-122152308(-)	MIPF0000033	mir-10	let7a-2,100,10526	p2@ENST00000533109	NR_024430	2.06998	4.19882	0.0176572	0.159242	14.5987	12.5287	4515.85	40390.8	17465.3	9471.65	25777.3	51248.5	7270.35	9455.72	9328.51	2103.32	5151.09	2144.98
hsa-miR-200c-3p	3p	MIMAT0000617	UAAUACUGCCGGGUAAUGAUGGA	AAUACU	23	Yes	Mature_miRNA	canonical_conserved_miRNA	hsa-mir-200c	MI0000650	CCCUCGUCUUACCCAGCAGUGUUUGGGUGCGGUUGGGAGUCUCUAAUACUGCCGGGUAAUGAUGGAGG	chr12:6963699-6963766(+)	MIPF0000019	mir-8	141,200c	p1@ENST00000537269	ENST00000607161.1	2.06515	4.18478	0.0268445	0.194923	9.28324	7.21809	1027.67	608.534	564.791	207.48	512.652	816.619	230.86	34.8311	20.24	149.772	332.611	124.816
hsa-miR-629-5p	5p	MIMAT0004810	UGGGUUUACGUUGGGAGAACU	GGGUUU	21	Yes	Mature_miRNA	canonical_hsa-specific_miRNA	hsa-mir-629	MI0003643	UCCCUUUCCCAGGGGAGGGGCUGGGUUUACGUUGGGAGAACUUUUACGGUGAACCAGGAGGUUCUCCCAACGUAAGCCCAGCCCCUCCCCUCUGCCU	chr15:70079372-70079468(-)	MIPF0001555	mir-629	629	p1@TLE3	NM_020908	1.92132	3.78771	0.0282953	0.201165	12.3752	10.4539	12413.7	3573.98	2028.77	1872.54	1353.04	10632.8	2222.23	459.404	2012.02	2247.89	1037.58	435.7
hsa-miR-183-5p	5p	MIMAT0000261	UAUGGCACUGGUAGAAUUCACU	AUGGCA	22	Yes	Mature_miRNA	canonical_conserved_miRNA	hsa-mir-183	MI0000273	CCGCAGAGUGUGACUCCUGUUCUGUGUAUGGCACUGGUAGAAUUCACUGUGAACAGUCUCAGUCAGUGAAUUACCGAAGGGCCAUAAACAGAGCAGAGACAGAUCCACGA	chr7:129774905-129775014(-)	MIPF0000066	mir-183	96,182,183	p@chr7:129420052..129420074,-	curation	1.82972	3.55469	0.045057	0.237219	9.74947	7.91975	541.88	683.185	977.584	193.778	210.554	2556.19	632.563	29.3314	38.3495	84.0027	509.731	158.331

## Sheet: down_Ca_vs_TB
#log2FC <= -0.585 #p-value cut-off <= 0.05 #q-value cut-off <= 1.00 #Gene biotype: miRNA #Condition pair: down_Ca_vs_TB Column A: Mature_ID, The ID of mature miRNA. Column B: Arm, The arm of miRNA. Column C: Mature_Acc, The accession number of mature miRNA from miRBase. Column D: Mature_Seq, The mature sequence of miRNA. Column E: Seed, The seed sequence of miRNA. Column F: Length, The length of …
Annotation																		DE Statistic				CPM
Mature_ID	Arm	Mature_Acc	Mature_Seq	Seed	Length	High_Confidence	Type	Canonical	Pre_ID	Pre_Acc	Pre_Seq	Pre_Locus	Family_AC	Family_ID	Clustered_miRNAs	Promoter	Primary_microRNA	log2FC	Fold_Change	p_value	q_value	Ca_CPM	TB_CPM	Ca1	Ca2	Ca3	Ca4	Ca5	Ca6	TB1	TB2	TB3	TB4	TB5	TB6
hsa-miR-373-5p	5p	MIMAT0000725	ACUCAAAAUGGGGGCGCUUUCC	CUCAAA	22	NO	Star_miRNA	canonical_conserved_miRNA	hsa-mir-373	MI0000781	GGGAUACUCAAAAUGGGGGCGCUUUCCUUUUUGUCUGUACUGGGAAGUGCUUCGAUUUUGGGGUGUCCC	chr19:53788705-53788773(+)	MIPF0000500	mir-373	371a,372,373,371b	p@chr19:54290224..54290230,+	curation	-7.18678	0.00686378	0.000482557	0.0261117	-3.96253	3.22425	0	0	0	0	0	0	0	0.733286	0	0	7.5992	48.5395
hsa-miR-519b-3p	3p	MIMAT0002837	AAAGUGCAUCCUUUUAGAGGUU	AAGUGC	22	Yes	Star_miRNA	canonical_hsa-specific_miRNA	hsa-mir-519b	MI0003151	CAUGCUGUGACCCUCUAGAGGGAAGCGCUUUCUGUUGUCUGAAAGAAAAGAAAGUGCAUCCUUUUAGAGGUUUACUGUUUG	chr19:53695213-53695293(+)	MIPF0000020	mir-515	512-1,512-2,498,520e,515-1,519e,520f,515-2,519c,520a,526b,519b,525,523,518f,520b,518b,526a-1,520c,518c,524,517a,519d,521-2,520d,517b,520g,516b-2,526a-2,518e,518a-1,518d,516b-1,518a-2,517c,520h,521-1,522,519a-1,527,516a-1,516a-2,519a-2,1323,1283-1,1283-2	Unknown	Unknown	-6.82625	0.00881241	0.00106532	0.0542857	-3.96253	2.86372	0	0	0	0	0	0	0	1.09993	0	0	17.5366	25.4254
hsa-miR-4674	5p	MIMAT0019756	CUGGGCUCGGGACGCGCGGCU	UGGGCU	21	NO	-	non-canonical_miRNA	hsa-mir-4674	MI0017305	CCCAGGCGCCCGCUCCCGACCCACGCCGCGCCGCCGGGUCCCUCCUCCCCGGAGAGGCUGGGCUCGGGACGCGCGGCUCAGCUCGGG	chr9:136546173-136546259(-)	-	-	4674	Unknown	Unknown	-6.06267	0.0149607	0.00456455	0.105854	-3.96253	2.10014	0	0	0	0	0	0	0	0	0.266316	0	25.1358	0
hsa-miR-345-3p	3p	MIMAT0022698	GCCCUGAACGAGGGGUCUGGAG	CCCUGA	22	Yes	Star_miRNA	canonical_conserved_miRNA	hsa-mir-345	MI0000825	ACCCAAACCCUAGGUCUGCUGACUCCUAGUCCAGGGCUCGUGAUGGCUGGUGGGCCCUGAACGAGGGGUCUGGAGGCCUGGGUUUGAAUAUCGACAGC	chr14:100307859-100307956(+)	MIPF0000189	mir-345	345	p@chr14:100772992..100773015,+	curation	-5.69566	0.0192946	0.00850884	0.132792	-3.96253	1.73313	0	0	0	0	0	0	0.952655	1.09993	1.06526	0.651184	15.783	0
hsa-miR-4671-5p	5p	MIMAT0019752	ACCGAAGACUGUGCGCUAAUCU	CCGAAG	22	NO	-	non-canonical_miRNA	hsa-mir-4671	MI0017302	UAUUUUAAGACCGAAGACUGUGCGCUAAUCUCUUAGCACUGAAGAUUAGUGCAUAGUCUUUGGUCUCAAAAUA	chr1:234306467-234306539(+)	-	-	4671	p1@SLC35F3	ENST00000366617.3	-5.6272	0.0202322	0.0092494	0.132792	-3.96253	1.66467	0	0	0	0	0	0	0	0	0	0	18.7057	0
hsa-miR-7705	5p	MIMAT0030020	AAUAGCUCAGAAUGUCAGUUCUG	AUAGCU	23	NO	-	non-canonical_miRNA	hsa-mir-7705	MI0025241	AAUAGCUCAGAAUGUCAGUUCUGUUUUAAGUAACAGAAUUGAUAACUGAGCAAGGAA	chr8:100702968-100703024(-)	-	-	7705	p1@PABPC1	NM_002568	-5.5654	0.0211178	0.0103957	0.13683	-3.96253	1.60287	0	0	0	0	0	0	2.54041	5.86629	5.85895	3.25592	0	0
hsa-miR-153-3p	3p	MIMAT0000439	UUGCAUAGUCACAAAAGUGAUC	UGCAUA	22	Yes	Mature_miRNA	canonical_conserved_miRNA	hsa-mir-153-2	MI0000464	AGCGGUGGCCAGUGUCAUUUUUGUGAUGUUGCAGCUAGUAAUAUGAGCCCAGUUGCAUAGUCACAAAAGUGAUCAUUGGAAACUGUG	chr7:157574336-157574422(-)	MIPF0000050	mir-153	153-2	p2@PTPRN2	NM_130842	-5.49456	0.0221805	0.0122495	0.141617	-3.96253	1.53204	0	0	0	0	0	0	0.317552	0.366643	0	0	0	17.3355
hsa-miR-33a-3p	3p	MIMAT0004506	CAAUGUUUCCACAGUGCAUCAC	AAUGUU	22	Yes	Star_miRNA	canonical_conserved_miRNA	hsa-mir-33a	MI0000091	CUGUGGUGCAUUGUAGUUGCAUUGCAUGUUCUGGUGGUACCCAUGCAAUGUUUCCACAGUGCAUCACAG	chr22:41900944-41901012(+)	MIPF0000070	mir-33	33a	p1@SREBF2	ENST00000361204.4	-5.42777	0.0232315	0.0129507	0.141617	-3.96253	1.46524	0	0	0	0	0	0	3.81062	4.39971	1.33158	0	6.43009	0
hsa-miR-4772-5p	5p	MIMAT0019926	UGAUCAGGCAAAAUUGCAGACU	GAUCAG	22	Yes	-	non-canonical_miRNA	hsa-mir-4772	MI0017414	GUGAUUGCCUCUGAUCAGGCAAAAUUGCAGACUGUCUUCCCAAAUAGCCUGCAACUUUGCCUGAUCAGAGGCAGUCAC	chr2:102432289-102432366(+)	-	-	4772	p1@IL18RAP	ENST00000409369.1	-5.31571	0.0251079	0.0151135	0.152615	-3.96253	1.35318	0	0	0	0	0	0	1.58776	4.03307	8.25579	0.651184	0	0
hsa-miR-580-3p	3p	MIMAT0003245	UUGAGAAUGAUGAAUCAUUAGG	UGAGAA	22	Yes	Mature_miRNA	canonical_hsa-specific_miRNA	hsa-mir-580	MI0003587	AUAAAAUUUCCAAUUGGAACCUAAUGAUUCAUCAGACUCAGAUAUUUAAGUUAACAGUAUUUGAGAAUGAUGAAUCAUUAGGUUCCGGUCAGAAAUU	chr5:36147892-36147988(-)	MIPF0000515	mir-580	580	p1@LMBRD2	NM_001007527	-5.27419	0.025841	0.016367	0.157837	-3.96253	1.31166	0	0	0	0	0	0	0	8.43279	5.06	0.651184	0	0
hsa-miR-8057	5p	MIMAT0030984	GUGGCUCUGUAGUAAGAUGGA	UGGCUC	21	NO	-	non-canonical_miRNA	hsa-mir-8057	MI0025893	AAUUUGGGAUGUGGCUCUGUAGUAAGAUGGACUUGCGGUUCAAUCCCAGCUCAGGGCCUUUUUAAAUUA	chr18:26591467-26591535(-)	-	-	8057	p@chr18:24237339..24237366,-	ENST00000584630.1	-5.24788	0.0263167	0.0168636	0.157934	-3.96253	1.28535	0	0	0	0	0	0	0	0	0.266316	0	0	15.0241
hsa-miR-4666a-5p	5p	MIMAT0019741	AUACAUGUCAGAUUGUAUGCC	UACAUG	21	NO	-	non-canonical_miRNA	hsa-mir-4666a	MI0017296	AUCACUUAAAUACAUGUCAGAUUGUAUGCCUACAAAAUCCCUCCAGACUGGCAUACAAUCUGACAUGUAUUUAAGAGAU	chr1:228462074-228462152(+)	-	-	4666a	p1@HIST3H2BB	curation	-5.05039	0.0301774	0.0236754	0.190577	-3.96253	1.08786	0	0	0	0	0	0	0.635103	0	0	0	0	12.7127
hsa-miR-3140-5p	5p	MIMAT0019204	ACCUGAAUUACCAAAAGCUUU	CCUGAA	21	Yes	Star_miRNA	canonical_conserved_miRNA	hsa-mir-3140	MI0014163	CCUCUUGAGGUACCUGAAUUACCAAAAGCUUUAUGUAUUCUGAAGUUAUUGAAAAUAAGAGCUUUUGGGAAUUCAGGUAGUUCAGGAGUG	chr4:152489327-152489416(-)	MIPF0001615	mir-3140	3140	p@chr4:153457197..153457268,-	ENST00000281708.4	-5.01818	0.0308587	0.0233338	0.189393	-3.96253	1.05565	0	0	0	0	0	0	1.58776	5.49964	3.99474	0.651184	0	0
hsa-miR-138-2-3p	3p	MIMAT0004596	GCUAUUUCACGACACCAGGGUU	CUAUUU	22	Yes	Star_miRNA	canonical_conserved_miRNA	hsa-mir-138-2	MI0000455	CGUUGCUGCAGCUGGUGUUGUGAAUCAGGCCGACGAGCAGCGCAUCCUCUUACCCGGCUAUUUCACGACACCAGGGUUGCAUCA	chr16:56858518-56858601(+)	MIPF0000075	mir-138	138-2	p@chr16:56891363..56891367,+	curation	-4.97247	0.0318521	0.0257659	0.194923	-3.96253	1.00994	0	0	0	0	0	0	0.635103	0	0	0	11.1065	0
hsa-miR-4764-5p	5p	MIMAT0019914	UGGAUGUGGAAGGAGUUAUCU	GGAUGU	21	NO	-	non-canonical_miRNA	hsa-mir-4764	MI0017405	UCUUCCCCAUGGAUGUGGAAGGAGUUAUCUGUCACCAGUCAGAUAACUGUCACCAGUCAGUUAACUCCUUUCACACCCAUGGGGAAGA	chr22:33436582-33436669(-)	-	-	4764	p@chr22:34316973..34317038,-	ENST00000437602.2	-4.82607	0.035254	0.0319347	0.209748	-3.96253	0.86354	0	0	0	0	0	0	0	0	0	0	0	11.557
hsa-miR-33b-3p	3p	MIMAT0004811	CAGUGCCUCGGCAGUGCAGCCC	AGUGCC	22	Yes	Star_miRNA	canonical_conserved_miRNA	hsa-mir-33b	MI0003646	GCGGGCGGCCCCGCGGUGCAUUGCUGUUGCAUUGCACGUGUGUGAGGCGGGUGCAGUGCCUCGGCAGUGCAGCCCGGAGCCGGCCCCUGGCACCAC	chr17:17813836-17813931(-)	MIPF0000070	mir-33	33b,6777	p1@SREBF1	ENST00000355815.4	-4.81404	0.0355493	0.0314085	0.209748	-3.96253	0.851507	0	0	0	0	0	0	1.90531	2.5665	3.72842	1.95355	0	0
hsa-miR-6828-5p	5p	MIMAT0027556	AGGAAGCAAGAGAACCCUGUGG	GGAAGC	22	NO	-	non-canonical_miRNA	hsa-mir-6828	MI0022673	GGCUCAGGAAGCAAGAGAACCCUGUGGUCUAACCUUUCCCAUCUGCUCUCUUGUUCCCAG	chr3:170423103-170423162(+)	-	-	6828	p1@CLDN11	ENST00000486975.1	-4.66703	0.0393626	0.0392091	0.221078	-3.96253	0.7045	0	0	0	0	0	0	0	0	0	0	0	10.4013
hsa-miR-4707-3p	3p	MIMAT0019808	AGCCCGCCCCAGCCGAGGUUCU	GCCCGC	22	Yes	-	non-canonical_miRNA	hsa-mir-4707	MI0017340	GGUUCCGGAGCCCCGGCGCGGGCGGGUUCUGGGGUGUAGACGCUGCUGGCCAGCCCGCCCCAGCCGAGGUUCUCGGCACC	chr14:22956950-22957029(-)	-	-	4707	p1@HAUS4	ENST00000397409.4	-4.65058	0.039814	0.0390062	0.221078	-3.96253	0.688052	0	0	0	0	0	0	0	1.09993	1.06526	7.16302	0	0
hsa-miR-4529-3p	3p	MIMAT0019068	AUUGGACUGCUGAUGGCCCGU	UUGGAC	21	NO	-	non-canonical_miRNA	hsa-mir-4529	MI0016896	AUGACAGGCCAUCAGCAGUCCAAUGAAGACAUGAAGACCCAAUGUCUUCAUUGGACUGCUGAUGGCCCGUCACUGGGA	chr18:55479221-55479298(+)	MIPF0001451	mir-4529	4529	p@chr18:53145002..53145011,+	ENST00000587660.1	-4.64473	0.0399758	0.0389985	0.221078	-3.96253	0.682201	0	0	0	0	0	0	0.317552	2.19986	0.798947	0	5.84554	0
hsa-miR-7702	5p	MIMAT0030017	CUUAGACUGCCAGACUCCCUGA	UUAGAC	22	NO	-	non-canonical_miRNA	hsa-mir-7702	MI0025238	CUUAGACUGCCAGACUCCCUGAGGACAUGCAGUUUCAGGGAGUCUGGUAGUCUAAGUGU	chr9:111271156-111271214(-)	-	-	7702	p1@ENST00000426204	ENST00000426204.1	-4.64278	0.04003	0.000222184	0.0154577	1.36321	6.00599	1.08921	0	0	13.7015	0	0	2.85797	21.2653	11.9842	22.1403	272.987	54.318
hsa-miR-216a-3p	3p	MIMAT0022844	UCACAGUGGUCUCUGGGAUUAU	CACAGU	22	Yes	Star_miRNA	canonical_conserved_miRNA	hsa-mir-216a	MI0000292	GAUGGCUGUGAGUUGGCUUAAUCUCAGCUGGCAACUGUGAGAUGUUCAUACAAUCCCUCACAGUGGUCUCUGGGAUUAUGCUAAACAGAGCAAUUUCCUAGCCCUCACGA	chr2:55988950-55989059(-)	MIPF0000054	mir-216	216a,217	p1@MIR216A	ENST00000446139.1	-4.54043	0.0429728	0.017613	0.159242	-2.60943	1.931	0	0	0.533325	0	0	0	0.317552	0	0	2.60474	6.43009	13.8684
hsa-miR-3614-3p	3p	MIMAT0017993	UAGCCUUCAGAUCUUGGUGUUUU	AGCCUU	23	Yes	Star_miRNA	canonical_hsa-specific_miRNA	hsa-mir-3614	MI0016004	GGUUCUGUCUUGGGCCACUUGGAUCUGAAGGCUGCCCCUUUGCUCUCUGGGGUAGCCUUCAGAUCUUGGUGUUUUGAAUUCUUACU	chr17:56891270-56891355(-)	-	-	3614	p1@TRIM25	NM_005082	-4.53992	0.0429882	0.0435641	0.236054	-3.96253	0.577386	0	0	0	0	0	0	0	3.29979	1.86421	3.25592	0	0
hsa-miR-518c-3p	3p	MIMAT0002848	CAAAGCGCUUCUCUUUAGAGUGU	AAAGCG	23	Yes	Mature_miRNA	canonical_conserved_miRNA	hsa-mir-518c	MI0003159	GCGAGAAGAUCUCAUGCUGUGACUCUCUGGAGGGAAGCACUUUCUGUUGUCUGAAAGAAAACAAAGCGCUUCUCUUUAGAGUGUUACGGUUUGAGAAAAGC	chr19:53708735-53708835(+)	MIPF0000020	mir-515	512-1,512-2,498,520e,515-1,519e,520f,515-2,519c,520a,526b,519b,525,523,518f,520b,518b,526a-1,520c,518c,524,517a,519d,521-2,520d,517b,520g,516b-2,526a-2,518e,518a-1,518d,516b-1,518a-2,517c,520h,521-1,522,519a-1,527,516a-1,516a-2,519a-2,1323,1283-1,1283-2	Unknown	Unknown	-4.52168	0.0435351	0.00349883	0.0851966	-0.642421	3.87926	0	0	3.19995	0	0	0	1.58776	2.5665	3.19579	2.60474	25.7204	53.1623
hsa-miR-191-3p	3p	MIMAT0001618	GCUGCGCUUGGAUUUCGUCCCC	CUGCGC	22	Yes	Star_miRNA	canonical_conserved_miRNA	hsa-mir-191	MI0000465	CGGCUGGACAGCGGGCAACGGAAUCCCAAAAGCAGCUGUUGUCUCCAGAGCAUUCCAGCUGCGCUUGGAUUUCGUCCCCUGCUCUCCUGCCU	chr3:49020618-49020709(-)	MIPF0000194	mir-191	191,425	p2@DALRD3	ENST00000313778.5	-4.28033	0.0514625	0.0101997	0.13683	-1.15445	3.12589	0	0	1.06665	0	0	1.04762	0.635103	4.76636	1.06526	5.20947	40.3342	0
hsa-miR-652-5p	5p	MIMAT0022709	CAACCCUAGGAGAGGGUGCCAUUCA	AACCCU	25	Yes	Star_miRNA	canonical_conserved_miRNA	hsa-mir-652	MI0003667	ACGAAUGGCUAUGCACUGCACAACCCUAGGAGAGGGUGCCAUUCACAUAGACUAUAAUUGAAUGGCGCCACUAGGGUUGUGCAGUGCACAACCUACAC	chrX:110055329-110055426(+)	MIPF0000333	mir-652	652	p1@TMEM164	NM_032227	-4.24638	0.0526879	0.0270114	0.194923	-2.61	1.63638	0	0	0.533325	0	0	0	0.635103	10.266	3.19579	3.9071	0	0
hsa-miR-9901	5p	MIMAT0039321	CGGUCGCCGCGGUUCGCCGCC	GGUCGC	21	NO	-	non-canonical_miRNA	hsa-mir-9901	MI0031829	GGAGAGGGUGGGGGAGCCCGUCCCGGUCGCCGCGGUUCGCCGCCGCCCCUGGUGGCGGUCCGGCGACCGGCCCACCAUCGCUCCAGCGCCCCUCCU	chr16:34163578-34163673(+)	-	-	9901	Unknown	Unknown	-4.14276	0.0566115	0.0329926	0.214232	-2.61767	1.52509	0	0	0	0	0	0.52381	0	0	0	0	16.9521	0
hsa-miR-1297	5p	MIMAT0005886	UUCAAGUAAUUCAGGUG	UCAAGU	17	NO	-	non-canonical_miRNA	hsa-mir-1297	MI0006358	UGUUUAUCUCUAGGGUUGAUCUAUUAGAAUUACUUAUCUGAGCCAAAGUAAUUCAAGUAAUUCAGGUGUAGUGAAAC	chr13:54311972-54312048(-)	MIPF0000584	mir-1297	1297	Unknown	Unknown	-4.1295	0.0571345	0.00341355	0.0851966	0.121841	4.25134	0	2.57417	2.1333	0	0	1.04762	15.2425	68.9289	22.1042	5.86065	1.16911	0
hsa-miR-519d-5p	5p	MIMAT0026610	CCUCCAAAGGGAAGCGCUUUCUGUU	CUCCAA	25	NO	Star_miRNA	canonical_hsa-specific_miRNA	hsa-mir-519d	MI0003162	UCCCAUGCUGUGACCCUCCAAAGGGAAGCGCUUUCUGUUUGUUUUCUCUUAAACAAAGUGCCUCCCUUUAGAGUGUUACCGUUUGGGA	chr19:53713347-53713434(+)	MIPF0000020	mir-515	512-1,512-2,498,520e,515-1,519e,520f,515-2,519c,520a,526b,519b,525,523,518f,520b,518b,526a-1,520c,518c,524,517a,519d,521-2,520d,517b,520g,516b-2,526a-2,518e,518a-1,518d,516b-1,518a-2,517c,520h,521-1,522,519a-1,527,516a-1,516a-2,519a-2,1323,1283-1,1283-2	Unknown	Unknown	-4.04927	0.0604016	0.0199254	0.17328	-1.50137	2.5479	0	0	0	0	0	1.57143	0.635103	0.733286	0	0.651184	32.735	0
hsa-miR-4477b	5p	MIMAT0019005	AUUAAGGACAUUUGUGAUUGAU	UUAAGG	22	NO	-	non-canonical_miRNA	hsa-mir-4477b	MI0016830	ACCUCCUCCCGUGAAUCACAAAUGUCCUUAAUAGCAAUCCUUAAAUGCCAUUAAGGACAUUUGUGAUUGAUGGGAGGAGGA	chr9:63819574-63819654(+)	MIPF0001274	mir-4477	4477b	Unknown	Unknown	-4.04813	0.0604495	0.02506	0.194923	-1.93853	2.1096	0	0	1.06665	0	0	0	0	13.5658	9.58737	1.95355	0	0
hsa-miR-374a-3p	3p	MIMAT0004688	CUUAUCAGAUUGUAUUGUAAUU	UUAUCA	22	Yes	Mature_miRNA	canonical_conserved_miRNA	hsa-mir-374a	MI0000782	UACAUCGGCCAUUAUAAUACAACCUGAUAAGUGUUAUAGCACUUAUCAGAUUGUAUUGUAAUUGUCUGUGUA	chrX:74287286-74287357(-)	MIPF0000288	mir-374	374a,545	p1@FTX	NR_028379	-3.99472	0.062729	0.000410086	0.0234955	3.28952	7.28424	1.63381	18.0192	17.5997	0.652452	20.1399	1.04762	64.1455	647.125	185.622	19.5355	17.5366	0
hsa-miR-7845-5p	5p	MIMAT0030420	AAGGGACAGGGAGGGUCGUGG	AGGGAC	21	NO	-	non-canonical_miRNA	hsa-mir-7845	MI0025515	GCAAGGGACAGGGAGGGUCGUGGCGACACUCGCGCCAGCUCCCGGGACGGCUGGGCUCGGGCUGGUCGCCGACCUCCGACCCUCCACUAGAUGCCUGGC	chr2:207166400-207166498(+)	-	-	7845	Unknown	Unknown	-3.98769	0.0630357	0.0408928	0.226305	-2.6105	1.37718	0	0	0.533325	0	0	0	0.635103	0	0	0	14.6138	0
hsa-miR-502-5p	5p	MIMAT0002873	AUCCUUGCUAUCUGGGUGCUA	UCCUUG	21	Yes	Star_miRNA	canonical_conserved_miRNA	hsa-mir-502	MI0003186	UGCUCCCCCUCUCUAAUCCUUGCUAUCUGGGUGCUAGUGCUGGCUCAAUGCAAUGCACCUGGGCAAGGAUUCAGAGAGGGGGAGCU	chrX:50014598-50014683(+)	MIPF0000139	mir-500	188,362,500a,501,502,532,660,500b	p1@CLCN5	ENST00000376091.3	-3.75808	0.0739106	0.0320132	0.209748	-1.50678	2.25129	0	1.02967	0.533325	0	0	0	1.27021	0.733286	2.13053	0.651184	23.3821	0
hsa-miR-424-5p	5p	MIMAT0001341	CAGCAGCAAUUCAUGUUUUGAA	AGCAGC	22	Yes	Mature_miRNA	canonical_conserved_miRNA	hsa-mir-424	MI0001446	CGAGGGGAUACAGCAGCAAUUCAUGUUUUGAAGUGUUCUAAAUGGUUCAAAACGUGAGGCGCUGCUAUACCCCCUCGUGGGGAAGGUAGAAGGUGGGG	chrX:134546614-134546711(-)	MIPF0000164	mir-322	424,450a-1,450a-2,503,542,450b	p@chrX:133683665..133683681,-	curation	-3.61475	0.0816304	0.00334408	0.0851966	1.87419	5.48894	0	6.17801	4.79992	0	0	9.95238	16.8302	152.523	92.4116	6.51184	0	0
hsa-miR-873-5p	5p	MIMAT0004953	GCAGGAACUUGUGAGUCUCCU	CAGGAA	21	Yes	Mature_miRNA	canonical_conserved_miRNA	hsa-mir-873	MI0005564	GUGUGCAUUUGCAGGAACUUGUGAGUCUCCUAUUGAAAAUGAACAGGAGACUGAUGAGUUCCCGGGAACACCCACAA	chr9:28888879-28888955(-)	MIPF0000390	mir-873	873	p@chr9:29212195..29212234,-	NM_001258282	-3.60043	0.0824449	0.0018883	0.0613068	2.87018	6.47061	6.53523	10.2967	6.93322	0	14.6472	5.76191	293.418	85.0612	138.751	12.3725	0	1.1557
hsa-miR-4802-3p	3p	MIMAT0019982	UACAUGGAUGGAAACCUUCAAGC	ACAUGG	23	Yes	-	non-canonical_miRNA	hsa-mir-4802	MI0017450	CUGACUGGCUUGUAUGGAGGUUCUAGACCAUGUUAGUGUUCAAGUCUACAUGGAUGGAAACCUUCAAGCAGGCCAAGCAG	chr4:40502040-40502119(-)	-	-	4802	p1@RBM47	ENST00000505414.1	-3.52804	0.0866868	0.0390723	0.221078	-1.15807	2.36998	0	0.514834	1.59997	0	0	0	2.54041	12.8325	9.05474	5.86065	0	0
hsa-miR-181b-3p	3p	MIMAT0022692	CUCACUGAACAAUGAAUGCAA	UCACUG	21	Yes	Star_miRNA	canonical_conserved_miRNA	hsa-mir-181b-1	MI0000270	CCUGUGCAGAGAUUAUUUUUUAAAAGGUCACAAUCAACAUUCAUUGCUGUCGGUGGGUUGAACUGUGUGGACAAGCUCACUGAACAAUGAAUGCAACUGUGGCCCCGCUU	chr1:198858873-198858982(-)	MIPF0000007	mir-181	181b-1,181a-1	p1@LOC100131234	NR_040073	-3.4155	0.09372	0.0101896	0.13683	0.987553	4.40305	0.544603	5.66317	4.79992	0	0	0	3.49307	78.8282	35.6863	3.25592	4.67643	0
hsa-miR-518d-5p	5p	MIMAT0005456	CUCUAGAGGGAAGCACUUUCUG	UCUAGA	22	Yes	Mature_miRNA	canonical_conserved_miRNA	hsa-mir-518d	MI0003171	UCCCAUGCUGUGACCCUCUAGAGGGAAGCACUUUCUGUUGUCUGAAAGAAACCAAAGCGCUUCCCUUUGGAGCGUUACGGUUUGAGA	chr19:53734877-53734963(+)	MIPF0000020	mir-515	512-1,512-2,498,520e,515-1,519e,520f,515-2,519c,520a,526b,519b,525,523,518f,520b,518b,526a-1,520c,518c,524,517a,519d,521-2,520d,517b,520g,516b-2,526a-2,518e,518a-1,518d,516b-1,518a-2,517c,520h,521-1,522,519a-1,527,516a-1,516a-2,519a-2,1323,1283-1,1283-2	Unknown	Unknown	-3.23864	0.105943	0.0272171	0.194923	0.886024	4.12466	1.08921	0	2.1333	0	9.15451	0	1.58776	1.09993	0.532632	1.95355	70.731	28.8926
hsa-miR-520c-5p	5p	MIMAT0005455	CUCUAGAGGGAAGCACUUUCUG	UCUAGA	22	Yes	Star_miRNA	canonical_hsa-specific_miRNA	hsa-mir-520c	MI0003158	UCUCAGGCUGUCGUCCUCUAGAGGGAAGCACUUUCUGUUGUCUGAAAGAAAAGAAAGUGCUUCCUUUUAGAGGGUUACCGUUUGAGA	chr19:53707453-53707539(+)	MIPF0000020	mir-515	512-1,512-2,498,520e,515-1,519e,520f,515-2,519c,520a,526b,519b,525,523,518f,520b,518b,526a-1,520c,518c,524,517a,519d,521-2,520d,517b,520g,516b-2,526a-2,518e,518a-1,518d,516b-1,518a-2,517c,520h,521-1,522,519a-1,527,516a-1,516a-2,519a-2,1323,1283-1,1283-2	Unknown	Unknown	-3.23864	0.105943	0.0272171	0.194923	0.886024	4.12466	1.08921	0	2.1333	0	9.15451	0	1.58776	1.09993	0.532632	1.95355	70.731	28.8926
hsa-miR-526a-5p	5p	MIMAT0002845	CUCUAGAGGGAAGCACUUUCUG	UCUAGA	22	Yes	Mature_miRNA	canonical_hsa-specific_miRNA	hsa-mir-526a-1	MI0003157	CUCAGGCUGUGACCCUCUAGAGGGAAGCACUUUCUGUUGCUUGAAAGAAGAGAAAGCGCUUCCUUUUAGAGGAUUACUCUUUGAG	chr19:53706252-53706336(+)	MIPF0000020	mir-515	512-1,512-2,498,520e,515-1,519e,520f,515-2,519c,520a,526b,519b,525,523,518f,520b,518b,526a-1,520c,518c,524,517a,519d,521-2,520d,517b,520g,516b-2,526a-2,518e,518a-1,518d,516b-1,518a-2,517c,520h,521-1,522,519a-1,527,516a-1,516a-2,519a-2,1323,1283-1,1283-2	Unknown	Unknown	-3.23864	0.105943	0.0272171	0.194923	0.886024	4.12466	1.08921	0	2.1333	0	9.15451	0	1.58776	1.09993	0.532632	1.95355	70.731	28.8926
hsa-miR-526a-5p	5p	MIMAT0002845	CUCUAGAGGGAAGCACUUUCUG	UCUAGA	22	Yes	Mature_miRNA	canonical_hsa-specific_miRNA	hsa-mir-526a-2	MI0003168	GUGACCCUCUAGAGGGAAGCACUUUCUGUUGAAAGAAAAGAACAUGCAUCCUUUCAGAGGGUUAC	chr19:53726922-53726986(+)	MIPF0000020	mir-515	512-1,512-2,498,520e,515-1,519e,520f,515-2,519c,520a,526b,519b,525,523,518f,520b,518b,526a-1,520c,518c,524,517a,519d,521-2,520d,517b,520g,516b-2,526a-2,518e,518a-1,518d,516b-1,518a-2,517c,520h,521-1,522,519a-1,527,516a-1,516a-2,519a-2,1323,1283-1,1283-2	Unknown	Unknown	-3.23864	0.105943	0.0272171	0.194923	0.886024	4.12466	1.08921	0	2.1333	0	9.15451	0	1.58776	1.09993	0.532632	1.95355	70.731	28.8926
hsa-miR-142-3p	3p	MIMAT0000434	UGUAGUGUUUCCUACUUUAUGGA	GUAGUG	23	Yes	Mature_miRNA	canonical_conserved_miRNA	hsa-mir-142	MI0000458	GACAGUGCAGUCACCCAUAAAGUAGAAAGCACUACUAACAGCACUGGAGGGUGUAGUGUUUCCUACUUUAUGGAUGAGUGUACUGUG	chr17:58331232-58331318(-)	MIPF0000084	mir-142	142,4736	p1@AX721088	ENST00000579003.1	-3.21907	0.10739	0.00181228	0.0613068	5.06326	8.28233	17.9719	55.6021	49.5992	44.3668	16.4781	15.7143	315.646	917.707	476.705	79.4444	75.992	1.1557
hsa-miR-518f-5p	5p	MIMAT0002841	CUCUAGAGGGAAGCACUUUCUC	UCUAGA	22	Yes	Star_miRNA	canonical_conserved_miRNA	hsa-mir-518f	MI0003154	UCUCAUGCUGUGACCCUCUAGAGGGAAGCACUUUCUCUUGUCUAAAAGAAAAGAAAGCGCUUCUCUUUAGAGGAUUACUCUUUGAGA	chr19:53700015-53700101(+)	MIPF0000020	mir-515	512-1,512-2,498,520e,515-1,519e,520f,515-2,519c,520a,526b,519b,525,523,518f,520b,518b,526a-1,520c,518c,524,517a,519d,521-2,520d,517b,520g,516b-2,526a-2,518e,518a-1,518d,516b-1,518a-2,517c,520h,521-1,522,519a-1,527,516a-1,516a-2,519a-2,1323,1283-1,1283-2	Unknown	Unknown	-3.21486	0.107704	0.0375273	0.221078	0.571279	3.78614	0.544603	0	2.1333	0	7.32361	0	3.81062	2.5665	0.532632	1.30237	73.0692	1.1557
hsa-miR-3909	5p	MIMAT0018183	UGUCCUCUAGGGCCUGCAGUCU	GUCCUC	22	NO	Mature_miRNA	canonical_hsa-specific_miRNA	hsa-mir-3909	MI0016413	GGUAUGCUGUUGCGCUGUCCUUCCUCUGGGGAGCAGGCUCCGGGGGACAGGGAAAAGCACACAAGGAACUUGUCCUCUAGGGCCUGCAGUCUCAUGGGAGAGUGACAUGCACCAGGACC	chr22:35335640-35335758(+)	-	-	3909,6069	p1@TOM1	ENST00000436462.2	-3.2095	0.108104	0.0258008	0.194923	0.455762	3.66526	2.17841	0.514834	3.19995	0	0	1.57143	7.62124	10.266	6.39158	28.0009	23.3821	0
hsa-miR-4433b-5p	5p	MIMAT0030413	AUGUCCCACCCCCACUCCUGU	UGUCCC	21	NO	-	non-canonical_miRNA	hsa-mir-4433b	MI0025511	UGUGUUCCCUAUCCUCCUUAUGUCCCACCCCCACUCCUGUUUGAAUAUUUCACCAGAAACAGGAGUGGGGGGUGGGACGUAAGGAGGAUGGGGGAAAGAACA	chr2:64340747-64340848(-)	MIPF0001826	mir-4433	4433a,4433b	p1@ENST00000424119	ENST00000424119.1	-3.18064	0.110289	0.0490503	0.251447	-0.456843	2.7238	1.63381	0.514834	0.533325	0	0	1.04762	0	0	0	0.651184	27.474	11.557
hsa-miR-454-3p	3p	MIMAT0003885	UAGUGCAAUAUUGCUUAUAGGGU	AGUGCA	23	Yes	Mature_miRNA	canonical_conserved_miRNA	hsa-mir-454	MI0003820	UCUGUUUAUCACCAGAUCCUAGAACCCUAUCAAUAUUGUCUCUGCUGUGUAAAUAGUUCUGAGUAGUGCAAUAUUGCUUAUAGGGUUUUGGUGUUUGGAAAGAACAAUGGGCAGG	chr17:59137758-59137872(-)	MIPF0000174	mir-454	454	p1@SKA2	ENST00000580541.1	-3.04212	0.121403	0.0119094	0.141617	2.29128	5.33341	2.17841	10.2967	5.86657	8.48188	0	1.57143	16.1951	94.2272	47.1379	54.0483	13.4447	16.1798
hsa-miR-10399-5p	5p	MIMAT0041629	AAUUACAGAUUGUCUCAGAGA	AUUACA	21	NO	-	non-canonical_miRNA	hsa-mir-10399	MI0033423	AAUUACAGAUUGUCUCAGAGAAAACAAAUGAGUUACUCUCUCGGACAAGCUGUAGGUC	chr7:139044100-139044157(-)	-	-	10399	Unknown	Unknown	-3.04113	0.121486	0.00580445	0.115378	3.66915	6.71028	12.5259	22.1379	22.933	0	1.8309	15.7143	45.4099	240.884	258.06	82.7003	0	0
hsa-miR-520a-5p	5p	MIMAT0002833	CUCCAGAGGGAAGUACUUUCU	UCCAGA	21	Yes	Star_miRNA	canonical_conserved_miRNA	hsa-mir-520a	MI0003149	CUCAGGCUGUGACCCUCCAGAGGGAAGUACUUUCUGUUGUCUGAGAGAAAAGAAAGUGCUUCCCUUUGGACUGUUUCGGUUUGAG	chr19:53690881-53690965(+)	MIPF0000020	mir-515	512-1,512-2,498,520e,515-1,519e,520f,515-2,519c,520a,526b,519b,525,523,518f,520b,518b,526a-1,520c,518c,524,517a,519d,521-2,520d,517b,520g,516b-2,526a-2,518e,518a-1,518d,516b-1,518a-2,517c,520h,521-1,522,519a-1,527,516a-1,516a-2,519a-2,1323,1283-1,1283-2	Unknown	Unknown	-2.96098	0.128427	0.0302809	0.205839	1.02732	3.9883	10.8921	0.514834	0	0	0	0	3.17552	1.09993	0.266316	3.25592	87.0985	0
hsa-miR-3614-5p	5p	MIMAT0017992	CCACUUGGAUCUGAAGGCUGCCC	CACUUG	23	Yes	Mature_miRNA	canonical_hsa-specific_miRNA	hsa-mir-3614	MI0016004	GGUUCUGUCUUGGGCCACUUGGAUCUGAAGGCUGCCCCUUUGCUCUCUGGGGUAGCCUUCAGAUCUUGGUGUUUUGAAUUCUUACU	chr17:56891270-56891355(-)	-	-	3614	p1@TRIM25	NM_005082	-2.94797	0.12959	0.0155122	0.152615	2.30227	5.25025	3.81222	7.72251	7.99987	0	5.4927	4.19048	4.12817	56.0964	43.4095	37.7687	47.3489	39.2939
hsa-miR-590-3p	3p	MIMAT0004801	UAAUUUUAUGUAUAAGCUAGU	AAUUUU	21	Yes	Mature_miRNA	canonical_conserved_miRNA	hsa-mir-590	MI0003602	UAGCCAGUCAGAAAUGAGCUUAUUCAUAAAAGUGCAGUAUGGUGAAGUCAAUCUGUAAUUUUAUGUAUAAGCUAGUCUCUGAUUGAAACAUGCAGCA	chr7:74191198-74191294(+)	MIPF0000418	mir-590	590	p1@EIF4H	ENST00000353999.6	-2.90421	0.133581	0.0442965	0.236054	0.62521	3.52942	0.544603	1.02967	4.79992	0	0	2.09524	6.66859	39.9641	17.8432	3.9071	0	0
hsa-miR-542-3p	3p	MIMAT0003389	UGUGACAGAUUGAUAACUGAAA	GUGACA	22	Yes	Mature_miRNA	canonical_conserved_miRNA	hsa-mir-542	MI0003686	CAGAUCUCAGACAUCUCGGGGAUCAUCAUGUCACGAGAUACCAGUGUGCACUUGUGACAGAUUGAUAACUGAAAGGUCUGGGAGCCACUCAUCUUCA	chrX:134541341-134541437(-)	MIPF0000185	mir-542	424,450a-1,450a-2,503,542,450b	p@chrX:133683665..133683681,-	curation	-2.77581	0.146016	0.00897339	0.132792	4.39132	7.16712	22.3287	50.9686	20.7997	11.0917	0	19.381	19.0531	301.747	477.238	31.908	30.9813	0
hsa-miR-21-5p	5p	MIMAT0000076	UAGCUUAUCAGACUGAUGUUGA	AGCUUA	22	Yes	Mature_miRNA	canonical_conserved_miRNA	hsa-mir-21	MI0000077	UGUCGGGUAGCUUAUCAGACUGAUGUUGACUGUUGAAUCUCAUGGCAACACCAGUCGAUGGGCUGUCUGACA	chr17:59841266-59841337(+)	MIPF0000060	mir-21	21	p1@AK310806	ENST00000592790.1	-2.77043	0.146561	0.00180335	0.0613068	14.9829	17.7533	12099.4	89595.5	55389	4303.58	13565.2	19340.1	97772.3	518813	591975	85209.4	21347.9	10568.9
hsa-miR-378e	5p	MIMAT0018927	ACUGGACUUGGAGUCAGGA	CUGGAC	19	NO	-	non-canonical_miRNA	hsa-mir-378e	MI0016750	CUGACUCCAGUGUCCAGGCCAGGGGCAGACAGUGGACAGAGAACAGUGCCCAAGACCACUGGACUUGGAGUCAGGACAU	chr5:170028488-170028566(+)	MIPF0000168	mir-378	378e	p1@DOCK2	ENST00000524185.1	-2.76772	0.146836	0.0092691	0.132792	4.40946	7.17719	20.1503	30.89	6.93322	48.9339	10.9854	8.90477	14.2898	125.392	198.405	32.5592	424.386	72.8092
hsa-miR-29c-3p	3p	MIMAT0000681	UAGCACCAUUUGAAAUCGGUUA	AGCACC	22	Yes	Mature_miRNA	canonical_conserved_miRNA	hsa-mir-29c	MI0000735	AUCUCUUACACAGGCUGACCGAUUUCUCCUGGUGUUCAGAGUCUGUUUUUGUCUAGCACCAUUUGAAAUCGGUUAUGAUGUAGGGGGA	chr1:207801852-207801939(-)	MIPF0000009	mir-29	29b-2,29c	p1@C1orf132	ENST00000608023.1	-2.7594	0.147686	0.0120186	0.141617	3.74982	6.50922	10.8921	21.623	37.3327	0	1.8309	7.85715	203.868	145.557	110.787	19.5355	1.16911	64.7193
hsa-miR-373-3p	3p	MIMAT0000726	GAAGUGCUUCGAUUUUGGGGUGU	AAGUGC	23	NO	Mature_miRNA	canonical_conserved_miRNA	hsa-mir-373	MI0000781	GGGAUACUCAAAAUGGGGGCGCUUUCCUUUUUGUCUGUACUGGGAAGUGCUUCGAUUUUGGGGUGUCCC	chr19:53788705-53788773(+)	MIPF0000500	mir-373	371a,372,373,371b	p@chr19:54290224..54290230,+	curation	-2.75629	0.148004	0.0152391	0.152615	3.43317	6.18947	14.1597	10.2967	4.79992	5.21962	27.4635	3.66667	10.4792	16.8656	14.1147	28.0009	322.089	46.2281
hsa-miR-29a-3p	3p	MIMAT0000086	UAGCACCAUCUGAAAUCGGUUA	AGCACC	22	Yes	Mature_miRNA	canonical_conserved_miRNA	hsa-mir-29a	MI0000087	AUGACUGAUUUCUUUUGGUGUUCAGAGUCAAUAUAAUUUUCUAGCACCAUCUGAAAUCGGUUAU	chr7:130876747-130876810(-)	MIPF0000009	mir-29	29a,29b-1	p@chr7:130597585..130597624,-	ENST00000432045.2	-2.74581	0.149084	0.00244832	0.0681333	9.08991	11.8357	317.503	975.61	995.184	344.495	384.489	251.429	8658.37	6266.66	5249.88	963.752	412.695	377.915
hsa-miR-148b-5p	5p	MIMAT0004699	AAGUUCUGUUAUACACUCAGGC	AGUUCU	22	Yes	Star_miRNA	canonical_conserved_miRNA	hsa-mir-148b	MI0000811	CAAGCACGAUUAGCAUUUGAGGUGAAGUUCUGUUAUACACUCAGGCUGUGGCUCUCUGAAAGUCAGUGCAUCACAGAACUUUGUCUCGAAAGCUUUCUA	chr12:54337216-54337314(+)	MIPF0000056	mir-148	148b	p1@COPZ1	ENST00000551412.1	-2.74182	0.149496	0.0205651	0.17726	2.62974	5.37156	2.72301	22.6527	7.99987	0	0	2.61905	27.627	140.058	59.1221	17.582	2.92277	0
hsa-miR-29b-3p	3p	MIMAT0000100	UAGCACCAUUUGAAAUCAGUGUU	AGCACC	23	Yes	Mature_miRNA	canonical_conserved_miRNA	hsa-mir-29b-1	MI0000105	CUUCAGGAAGCUGGUUUCAUAUGGUGGUUUAGAUUUAAAUAGUGAUUGUCUAGCACCAUUUGAAAUCAGUGUUCUUGGGGG	chr7:130877459-130877539(-)	MIPF0000009	mir-29	29a,29b-1	p@chr7:130597585..130597624,-	ENST00000432045.2	-2.72155	0.151611	0.007957	0.132792	5.20644	7.928	10.8921	51.4834	70.9322	27.403	47.6034	13.0952	410.277	464.537	324.373	136.097	8.18375	116.726
hsa-miR-518e-5p	5p	MIMAT0005450	CUCUAGAGGGAAGCGCUUUCUG	UCUAGA	22	Yes	Mature_miRNA	canonical_conserved_miRNA	hsa-mir-518e	MI0003169	UCUCAGGCUGUGACCCUCUAGAGGGAAGCGCUUUCUGUUGGCUAAAAGAAAAGAAAGCGCUUCCCUUCAGAGUGUUAACGCUUUGAGA	chr19:53729838-53729925(+)	MIPF0000020	mir-515	512-1,512-2,498,520e,515-1,519e,520f,515-2,519c,520a,526b,519b,525,523,518f,520b,518b,526a-1,520c,518c,524,517a,519d,521-2,520d,517b,520g,516b-2,526a-2,518e,518a-1,518d,516b-1,518a-2,517c,520h,521-1,522,519a-1,527,516a-1,516a-2,519a-2,1323,1283-1,1283-2	Unknown	Unknown	-2.70675	0.153175	0.0128875	0.141617	4.00118	6.70793	19.6057	14.4153	2.1333	39.1471	9.15451	11	8.5739	8.43279	10.3863	22.7914	413.279	164.11
hsa-miR-519b-5p	5p	MIMAT0005454	CUCUAGAGGGAAGCGCUUUCUG	UCUAGA	22	Yes	Mature_miRNA	canonical_hsa-specific_miRNA	hsa-mir-519b	MI0003151	CAUGCUGUGACCCUCUAGAGGGAAGCGCUUUCUGUUGUCUGAAAGAAAAGAAAGUGCAUCCUUUUAGAGGUUUACUGUUUG	chr19:53695213-53695293(+)	MIPF0000020	mir-515	512-1,512-2,498,520e,515-1,519e,520f,515-2,519c,520a,526b,519b,525,523,518f,520b,518b,526a-1,520c,518c,524,517a,519d,521-2,520d,517b,520g,516b-2,526a-2,518e,518a-1,518d,516b-1,518a-2,517c,520h,521-1,522,519a-1,527,516a-1,516a-2,519a-2,1323,1283-1,1283-2	Unknown	Unknown	-2.70675	0.153175	0.0128875	0.141617	4.00118	6.70793	19.6057	14.4153	2.1333	39.1471	9.15451	11	8.5739	8.43279	10.3863	22.7914	413.279	164.11
hsa-miR-519c-5p	5p	MIMAT0002831	CUCUAGAGGGAAGCGCUUUCUG	UCUAGA	22	Yes	Star_miRNA	canonical_conserved_miRNA	hsa-mir-519c	MI0003148	UCUCAGCCUGUGACCCUCUAGAGGGAAGCGCUUUCUGUUGUCUGAAAGAAAAGAAAGUGCAUCUUUUUAGAGGAUUACAGUUUGAGA	chr19:53686469-53686555(+)	MIPF0000020	mir-515	512-1,512-2,498,520e,515-1,519e,520f,515-2,519c,520a,526b,519b,525,523,518f,520b,518b,526a-1,520c,518c,524,517a,519d,521-2,520d,517b,520g,516b-2,526a-2,518e,518a-1,518d,516b-1,518a-2,517c,520h,521-1,522,519a-1,527,516a-1,516a-2,519a-2,1323,1283-1,1283-2	Unknown	Unknown	-2.70675	0.153175	0.0128875	0.141617	4.00118	6.70793	19.6057	14.4153	2.1333	39.1471	9.15451	11	8.5739	8.43279	10.3863	22.7914	413.279	164.11
hsa-miR-522-5p	5p	MIMAT0005451	CUCUAGAGGGAAGCGCUUUCUG	UCUAGA	22	Yes	Star_miRNA	canonical_conserved_miRNA	hsa-mir-522	MI0003177	UCUCAGGCUGUGUCCCUCUAGAGGGAAGCGCUUUCUGUUGUCUGAAAGAAAAGAAAAUGGUUCCCUUUAGAGUGUUACGCUUUGAGA	chr19:53751211-53751297(+)	MIPF0000020	mir-515	512-1,512-2,498,520e,515-1,519e,520f,515-2,519c,520a,526b,519b,525,523,518f,520b,518b,526a-1,520c,518c,524,517a,519d,521-2,520d,517b,520g,516b-2,526a-2,518e,518a-1,518d,516b-1,518a-2,517c,520h,521-1,522,519a-1,527,516a-1,516a-2,519a-2,1323,1283-1,1283-2	Unknown	Unknown	-2.70675	0.153175	0.0128875	0.141617	4.00118	6.70793	19.6057	14.4153	2.1333	39.1471	9.15451	11	8.5739	8.43279	10.3863	22.7914	413.279	164.11
hsa-miR-523-5p	5p	MIMAT0005449	CUCUAGAGGGAAGCGCUUUCUG	UCUAGA	22	Yes	Star_miRNA	canonical_conserved_miRNA	hsa-mir-523	MI0003153	UCUCAUGCUGUGACCCUCUAGAGGGAAGCGCUUUCUGUUGUCUGAAAGAAAAGAACGCGCUUCCCUAUAGAGGGUUACCCUUUGAGA	chr19:53698385-53698471(+)	MIPF0000020	mir-515	512-1,512-2,498,520e,515-1,519e,520f,515-2,519c,520a,526b,519b,525,523,518f,520b,518b,526a-1,520c,518c,524,517a,519d,521-2,520d,517b,520g,516b-2,526a-2,518e,518a-1,518d,516b-1,518a-2,517c,520h,521-1,522,519a-1,527,516a-1,516a-2,519a-2,1323,1283-1,1283-2	Unknown	Unknown	-2.70675	0.153175	0.0128875	0.141617	4.00118	6.70793	19.6057	14.4153	2.1333	39.1471	9.15451	11	8.5739	8.43279	10.3863	22.7914	413.279	164.11
hsa-miR-32-5p	5p	MIMAT0000090	UAUUGCACAUUACUAAGUUGCA	AUUGCA	22	Yes	Mature_miRNA	canonical_conserved_miRNA	hsa-mir-32	MI0000090	GGAGAUAUUGCACAUUACUAAGUUGCAUGUUGUCACGGCCUCAAUGCAAUUUAGUGUGUGUGAUAUUUUC	chr9:109046229-109046298(-)	MIPF0000069	mir-32	32	p1@C9orf5	NM_032012	-2.6889	0.155082	0.01837	0.161193	3.26364	5.95255	1.63381	16.9895	14.9331	2.60981	5.4927	15.1905	109.238	151.79	66.0463	6.51184	4.67643	32.3597
hsa-miR-519a-5p	5p	MIMAT0005452	CUCUAGAGGGAAGCGCUUUCUG	UCUAGA	22	Yes	Mature_miRNA	canonical_hsa-specific_miRNA	hsa-mir-519a-1	MI0003178	CUCAGGCUGUGACACUCUAGAGGGAAGCGCUUUCUGUUGUCUGAAAGAAAGGAAAGUGCAUCCUUUUAGAGUGUUACUGUUUGAG	chr19:53752397-53752481(+)	MIPF0000020	mir-515	512-1,512-2,498,520e,515-1,519e,520f,515-2,519c,520a,526b,519b,525,523,518f,520b,518b,526a-1,520c,518c,524,517a,519d,521-2,520d,517b,520g,516b-2,526a-2,518e,518a-1,518d,516b-1,518a-2,517c,520h,521-1,522,519a-1,527,516a-1,516a-2,519a-2,1323,1283-1,1283-2	Unknown	Unknown	-2.68525	0.155474	0.0130097	0.141617	4.1192	6.80446	26.1409	14.4153	3.73327	39.1471	9.15451	11	11.4319	12.4659	14.1147	22.7914	446.015	164.11
hsa-miR-29b-3p	3p	MIMAT0000100	UAGCACCAUUUGAAAUCAGUGUU	AGCACC	23	Yes	Mature_miRNA	canonical_conserved_miRNA	hsa-mir-29b-2	MI0000107	CUUCUGGAAGCUGGUUUCACAUGGUGGCUUAGAUUUUUCCAUCUUUGUAUCUAGCACCAUUUGAAAUCAGUGUUUUAGGAG	chr1:207802443-207802523(-)	MIPF0000009	mir-29	29b-2,29c	p1@C1orf132	ENST00000608023.1	-2.67954	0.156091	0.00889171	0.132792	5.24845	7.928	10.8921	51.4834	70.9322	33.9275	47.6034	13.0952	410.277	464.537	324.373	136.097	8.18375	116.726
hsa-miR-516a-5p	5p	MIMAT0004770	UUCUCGAGGAAAGAAGCACUUUC	UCUCGA	23	Yes	Mature_miRNA	canonical_hsa-specific_miRNA	hsa-mir-516a-1	MI0003180	UCUCAGGCUGUGACCUUCUCGAGGAAAGAAGCACUUUCUGUUGUCUGAAAGAAAAGAAAGUGCUUCCUUUCAGAGGGUUACGGUUUGAGA	chr19:53756741-53756830(+)	MIPF0000020	mir-515	512-1,512-2,498,520e,515-1,519e,520f,515-2,519c,520a,526b,519b,525,523,518f,520b,518b,526a-1,520c,518c,524,517a,519d,521-2,520d,517b,520g,516b-2,526a-2,518e,518a-1,518d,516b-1,518a-2,517c,520h,521-1,522,519a-1,527,516a-1,516a-2,519a-2,1323,1283-1,1283-2	Unknown	Unknown	-2.57953	0.167296	0.0132006	0.141617	4.93065	7.51018	48.4696	30.3752	16.5331	15.6589	60.4198	12.0476	31.4376	25.2984	28.7621	44.9317	732.446	231.14
hsa-miR-516a-5p	5p	MIMAT0004770	UUCUCGAGGAAAGAAGCACUUUC	UCUCGA	23	Yes	Mature_miRNA	canonical_hsa-specific_miRNA	hsa-mir-516a-2	MI0003181	UCUCAGGUUGUGACCUUCUCGAGGAAAGAAGCACUUUCUGUUGUCUGAAAGAAAAGAAAGUGCUUCCUUUCAGAGGGUUACGGUUUGAGA	chr19:53761133-53761222(+)	MIPF0000020	mir-515	512-1,512-2,498,520e,515-1,519e,520f,515-2,519c,520a,526b,519b,525,523,518f,520b,518b,526a-1,520c,518c,524,517a,519d,521-2,520d,517b,520g,516b-2,526a-2,518e,518a-1,518d,516b-1,518a-2,517c,520h,521-1,522,519a-1,527,516a-1,516a-2,519a-2,1323,1283-1,1283-2	Unknown	Unknown	-2.57953	0.167296	0.0132006	0.141617	4.93065	7.51018	48.4696	30.3752	16.5331	15.6589	60.4198	12.0476	31.4376	25.2984	28.7621	44.9317	732.446	231.14
hsa-miR-372-5p	5p	MIMAT0026484	CCUCAAAUGUGGAGCACUAUUCU	CUCAAA	23	NO	Star_miRNA	canonical_conserved_miRNA	hsa-mir-372	MI0000780	GUGGGCCUCAAAUGUGGAGCACUAUUCUGAUGUCCAAGUGGAAAGUGCUGCGACAUUUGAGCGUCAC	chr19:53787890-53787956(+)	MIPF0000068	mir-290	371a,372,373,371b	p@chr19:54290224..54290230,+	curation	-2.55139	0.170591	0.0384975	0.221078	2.48816	5.03955	7.62444	2.57417	1.59997	8.48188	12.8163	1.04762	2.22286	3.66643	2.13053	5.86065	137.37	46.2281
hsa-let-7g-3p	3p	MIMAT0004584	CUGUACAGGCCACUGCCUUGC	UGUACA	21	Yes	Star_miRNA	canonical_conserved_miRNA	hsa-let-7g	MI0000433	AGGCUGAGGUAGUAGUUUGUACAGUUUGAGGGUCUAUGAUACCACCCGGUACAGGAGAUAACUGUACAGGCCACUGCCUUGCCA	chr3:52268278-52268361(-)	MIPF0000002	let-7	let7g	p1@WDR82	NM_025222	-2.54052	0.17188	0.044351	0.236054	2.06101	4.60153	10.8921	2.57417	4.79992	0	3.6618	2.61905	117.494	9.89936	15.18	1.95355	0	0
hsa-miR-10399-3p	3p	MIMAT0041630	CUCUCGGACAAGCUGUAGGUC	UCUCGG	21	NO	-	non-canonical_miRNA	hsa-mir-10399	MI0033423	AAUUACAGAUUGUCUCAGAGAAAACAAAUGAGUUACUCUCUCGGACAAGCUGUAGGUC	chr7:139044100-139044157(-)	-	-	10399	Unknown	Unknown	-2.51844	0.174532	0.0182878	0.161193	4.36944	6.88788	9.25825	30.3752	42.666	0	5.4927	35.0953	32.7078	294.048	161.92	119.167	66.0546	35.8268
hsa-miR-618	5p	MIMAT0003287	AAACUCUACUUGUCCUUCUGAGU	AACUCU	23	NO	-	non-canonical_miRNA	hsa-mir-618	MI0003632	CUCUUGUUCACAGCCAAACUCUACUUGUCCUUCUGAGUGUAAUUACGUACAUGCAGUAGCUCAGGAGACAAGCAGGUUUACCCUGUGGAUGAGUCUGA	chr12:80935736-80935833(-)	MIPF0000553	mir-618	618	p1@LIN7A	ENST00000261203.3	-2.49199	0.177762	0.0380298	0.221078	2.61235	5.10434	10.3475	6.69284	5.33325	0	3.6618	9.95238	1.27021	125.392	78.5632	0	0	0
hsa-let-7g-5p	5p	MIMAT0000414	UGAGGUAGUAGUUUGUACAGUU	GAGGUA	22	Yes	Mature_miRNA	canonical_conserved_miRNA	hsa-let-7g	MI0000433	AGGCUGAGGUAGUAGUUUGUACAGUUUGAGGGUCUAUGAUACCACCCGGUACAGGAGAUAACUGUACAGGCCACUGCCUUGCCA	chr3:52268278-52268361(-)	MIPF0000002	let-7	let7g	p1@WDR82	NM_025222	-2.48622	0.178473	0.00485842	0.107236	13.2965	15.7827	3331.88	11758.8	19427.4	4610.23	3938.27	17297.8	230859	23013.4	26086.7	45584.2	6339.49	6349.43
hsa-miR-150-5p	5p	MIMAT0000451	UCUCCCAACCCUUGUACCAGUG	CUCCCA	22	Yes	Mature_miRNA	canonical_conserved_miRNA	hsa-mir-150	MI0000479	CUCCCCAUGGCCCUGUCUCCCAACCCUUGUACCAGUGCUGGGCUCAGACCCUGGUACAGGCCUGGGGGACAGGGACCUGGGGAC	chr19:49500785-49500868(-)	MIPF0000197	mir-150	150	p1@MIR150	curation	-2.45243	0.182703	0.00863759	0.132792	7.39561	9.84804	303.344	166.806	138.664	31.3177	309.422	61.2857	234.671	1404.98	735.032	2698.51	310.398	145.618
hsa-miR-378c	5p	MIMAT0016847	ACUGGACUUGGAGUCAGAAGAGUGG	CUGGAC	25	NO	-	non-canonical_miRNA	hsa-mir-378c	MI0015825	GGAGGCCAUCACUGGACUUGGAGUCAGAAGAGUGGAGUCGGGUCAGACUUCAACUCUGACUUUGAAGGUGGUGAGUGCCUC	chr10:130962588-130962668(-)	-	-	378c	Unknown	Unknown	-2.41915	0.186967	0.00650843	0.121908	10.5638	12.9829	1584.79	2105.67	562.657	3040.43	902.635	884.715	940.588	4579.37	9827.85	2059.04	25526.9	5639.83
hsa-miR-378b	5p	MIMAT0014999	ACUGGACUUGGAGGCAGAA	CUGGAC	19	NO	-	non-canonical_miRNA	hsa-mir-378b	MI0014154	GGUCAUUGAGUCUUCAAGGCUAGUGGAAAGAGCACUGGACUUGGAGGCAGAAAGACC	chr3:10330229-10330285(+)	MIPF0000168	mir-378	378b	Unknown	Unknown	-2.34435	0.196916	0.0397809	0.221409	3.34038	5.68472	10.3475	11.3263	3.73327	22.8358	7.32361	4.71429	4.76328	48.0302	77.2316	18.2331	132.109	27.7369
hsa-miR-142-5p	5p	MIMAT0000433	CAUAAAGUAGAAAGCACUACU	AUAAAG	21	Yes	Star_miRNA	canonical_conserved_miRNA	hsa-mir-142	MI0000458	GACAGUGCAGUCACCCAUAAAGUAGAAAGCACUACUAACAGCACUGGAGGGUGUAGUGUUUCCUACUUUAUGGAUGAGUGUACUGUG	chr17:58331232-58331318(-)	MIPF0000084	mir-142	142,4736	p1@AX721088	ENST00000579003.1	-2.25611	0.209336	0.0103184	0.13683	11.8159	14.072	1094.11	2614.84	10815.3	961.715	1265.15	4879.29	34498.8	17402.3	31034.8	16649.5	2247.02	1501.26
hsa-miR-223-3p	3p	MIMAT0000280	UGUCAGUUUGUCAAAUACCCCA	GUCAGU	22	Yes	Mature_miRNA	canonical_conserved_miRNA	hsa-mir-223	MI0000300	CCUGGCCUCCUGCAGUGCCACGCUCCGUGUAUUUGACAAGCUGAGUUGGACACUCCAUGUGGUAGAGUGUCAGUUUGUCAAAUACCCCAAGUGCGGCACAUGCUUACCAG	chrX:66018870-66018979(+)	MIPF0000067	mir-223	223	p1@ENST00000538676,p1@ENST00000540516,p1@uc004dwg.1,p1@uc011mox.1	curation	-2.2198	0.214671	0.0172373	0.158388	7.27867	9.49847	177.54	146.213	204.797	153.326	97.0378	151.905	153.377	2062	1527.59	263.078	170.69	161.798
hsa-miR-140-5p	5p	MIMAT0000431	CAGUGGUUUUACCCUAUGGUAG	AGUGGU	22	Yes	Star_miRNA	canonical_conserved_miRNA	hsa-mir-140	MI0000456	UGUGUCUCUCUCUGUGUCCUGCCAGUGGUUUUACCCUAUGGUAGGUUACGUCAUGCUGUUCUACCACAGGGUAGAACCACGGACAGGAUACCGGGGCACC	chr16:69933081-69933180(+)	MIPF0000085	mir-140	140	p1@WWP2	ENST00000359154.2	-2.21786	0.21496	0.0430758	0.235707	3.91147	6.12934	6.53523	21.623	33.0661	15.6589	1.8309	10.4762	53.6662	208.253	111.853	25.3962	8.18375	11.557
hsa-miR-517a-3p	3p	MIMAT0002852	AUCGUGCAUCCCUUUAGAGUGU	UCGUGC	22	Yes	Mature_miRNA	canonical_hsa-specific_miRNA	hsa-mir-517a	MI0003161	UCUCAGGCAGUGACCCUCUAGAUGGAAGCACUGUCUGUUGUAUAAAAGAAAAGAUCGUGCAUCCCUUUAGAGUGUUACUGUUUGAGA	chr19:53712268-53712354(+)	MIPF0000020	mir-515	512-1,512-2,498,520e,515-1,519e,520f,515-2,519c,520a,526b,519b,525,523,518f,520b,518b,526a-1,520c,518c,524,517a,519d,521-2,520d,517b,520g,516b-2,526a-2,518e,518a-1,518d,516b-1,518a-2,517c,520h,521-1,522,519a-1,527,516a-1,516a-2,519a-2,1323,1283-1,1283-2	Unknown	Unknown	-2.21501	0.215385	0.0372823	0.221078	4.60795	6.82296	31.587	10.2967	6.93322	32.6226	62.2507	3.66667	17.7829	16.1323	15.7126	20.8379	454.198	154.864
hsa-miR-517b-3p	3p	MIMAT0002857	AUCGUGCAUCCCUUUAGAGUGU	UCGUGC	22	Yes	Mature_miRNA	canonical_hsa-specific_miRNA	hsa-mir-517b	MI0003165	GUGACCCUCUAGAUGGAAGCACUGUCUGUUGUCUAAGAAAAGAUCGUGCAUCCCUUUAGAGUGUUAC	chr19:53721076-53721142(+)	MIPF0000020	mir-515	512-1,512-2,498,520e,515-1,519e,520f,515-2,519c,520a,526b,519b,525,523,518f,520b,518b,526a-1,520c,518c,524,517a,519d,521-2,520d,517b,520g,516b-2,526a-2,518e,518a-1,518d,516b-1,518a-2,517c,520h,521-1,522,519a-1,527,516a-1,516a-2,519a-2,1323,1283-1,1283-2	Unknown	Unknown	-2.21501	0.215385	0.0372823	0.221078	4.60795	6.82296	31.587	10.2967	6.93322	32.6226	62.2507	3.66667	17.7829	16.1323	15.7126	20.8379	454.198	154.864
hsa-miR-371a-3p	3p	MIMAT0000723	AAGUGCCGCCAUCUUUUGAGUGU	AGUGCC	23	Yes	Star_miRNA	canonical_conserved_miRNA	hsa-mir-371a	MI0000779	GUGGCACUCAAACUGUGGGGGCACUUUCUGCUCUCUGGUGAAAGUGCCGCCAUCUUUUGAGUGUUAC	chr19:53787675-53787741(+)	MIPF0000068	mir-290	371a,372,373,371b	p@chr19:54290224..54290230,+	curation	-2.18432	0.220015	0.0397515	0.221409	4.6843	6.86863	20.6949	4.63351	3.73327	36.5373	87.8833	2.61905	16.5127	13.1991	10.12	18.2331	511.485	131.75
hsa-miR-450b-5p	5p	MIMAT0004909	UUUUGCAAUAUGUUCCUGAAUA	UUUGCA	22	Yes	Mature_miRNA	canonical_conserved_miRNA	hsa-mir-450b	MI0005531	GCAGAAUUAUUUUUGCAAUAUGUUCCUGAAUAUGUAAUAUAAGUGUAUUGGGAUCAUUUUGCAUCCAUAGUUUUGUAU	chrX:134540185-134540262(-)	MIPF0000128	mir-450	424,450a-1,450a-2,503,542,450b	p@chrX:133683665..133683681,-	curation	-2.1698	0.222241	0.0337834	0.216811	5.23402	7.40382	31.0424	55.6021	77.3321	16.9638	0	43.4762	64.463	562.064	294.279	72.9326	21.0439	0
hsa-miR-342-3p	3p	MIMAT0000753	UCUCACACAGAAAUCGCACCCGU	CUCACA	23	Yes	Mature_miRNA	canonical_conserved_miRNA	hsa-mir-342	MI0000805	GAAACUGGGCUCAAGGUGAGGGGUGCUAUCUGUGAUUGAGGGACAUGGUUAAUGGAAUUGUCUCACACAGAAAUCGCACCCGUCACCUUGGCCUACUUA	chr14:100109655-100109753(+)	MIPF0000190	mir-342	342,151b	p1@EVL	ENST00000555706.1	-2.14977	0.225349	0.0231669	0.189393	6.91636	9.06613	69.7092	201.3	115.731	71.1173	219.708	47.6667	504.272	952.538	413.855	1071.85	201.086	71.6535
hsa-miR-20a-5p	5p	MIMAT0000075	UAAAGUGCUUAUAGUGCAGGUAG	AAAGUG	23	Yes	Mature_miRNA	canonical_conserved_miRNA	hsa-mir-20a	MI0000076	GUAGCACUAAAGUGCUUAUAGUGCAGGUAGUGUUUAGUUAUCUACUGCAUUAUGAGCACUUAAAGUACUGC	chr13:91351065-91351135(+)	MIPF0000001	mir-17	17,18a,19a,19b-1,20a,92a-1	p1@MIR17HG	NR_027349	-2.05715	0.240291	0.0247019	0.19403	7.90416	9.96131	142.686	366.047	321.595	105.045	42.1107	458.334	557.303	2807.02	1605.88	439.549	403.927	166.421
hsa-miR-378d	5p	MIMAT0018926	ACUGGACUUGGAGUCAGAAA	CUGGAC	20	NO	-	non-canonical_miRNA	hsa-mir-378d-1	MI0016749	ACUGUUUCUGUCCUUGUUCUUGUUGUUAUUACUGGACUUGGAGUCAGAAACAGG	chr4:5923275-5923328(-)	MIPF0000168	mir-378	378d-1	Unknown	Unknown	-2.05204	0.241143	0.0217107	0.183929	8.93544	10.9875	448.208	606.474	145.598	1032.18	444.909	259.81	171.478	981.503	1862.88	451.922	7140.91	1572.91
hsa-miR-378d	5p	MIMAT0018926	ACUGGACUUGGAGUCAGAAA	CUGGAC	20	NO	-	non-canonical_miRNA	hsa-mir-378d-2	MI0003840	GAAUGGUUACAAGGAGAGAACACUGGACUUGGAGUCAGAAAACUUUCAUCCAAGUCAUUCCCUGCUCUAAGUCCCAUUUCUGUUCCAUGAGAUUGUUU	chr8:93916022-93916119(-)	MIPF0000168	mir-378	378d-2	p@chr8:94928861..94928882,-	ENST00000607097.1	-2.01583	0.247272	0.0241058	0.190887	8.92385	10.9397	438.95	622.434	161.597	995.642	435.755	259.286	166.08	949.238	1769.67	461.689	6921.7	1516.28
hsa-miR-101-3p	3p	MIMAT0000099	UACAGUACUGUGAUAACUGAA	ACAGUA	21	Yes	Mature_miRNA	canonical_conserved_miRNA	hsa-mir-101-2	MI0000739	ACUGUCCUUUUUCGGUUAUCAUGGUACCGAUGCUGUAUAUCUGAAAGGUACAGUACUGUGAUAACUGAAGAAUGGUGGU	chr9:4850297-4850375(+)	MIPF0000046	mir-101	101-2	p1@RCL1	ENST00000442869.1	-1.89392	0.269075	0.029502	0.204459	11.6482	13.5422	1908.83	6442.63	1159.45	870.371	1007	7868.67	9936.51	40609.7	16855.4	1174.08	1528.61	1466.59
hsa-miR-101-3p	3p	MIMAT0000099	UACAGUACUGUGAUAACUGAA	ACAGUA	21	Yes	Mature_miRNA	canonical_conserved_miRNA	hsa-mir-101-1	MI0000103	UGCCCUGGCUCAGUUAUCACAGUGCUGAUGCUGUCUAUUCUAAAGGUACAGUACUGUGAUAACUGAAGGAUGGCA	chr1:65058434-65058508(-)	MIPF0000046	mir-101	101-1,3671	p1@ENST00000448344	curation	-1.88839	0.270109	0.0299593	0.205495	11.6356	13.524	1891.95	6387.54	1139.71	875.591	983.194	7811.57	9877.45	40068.2	16628.8	1136.32	1505.81	1460.81
hsa-miR-372-3p	3p	MIMAT0000724	AAAGUGCUGCGACAUUUGAGCGU	AAGUGC	23	NO	Mature_miRNA	canonical_conserved_miRNA	hsa-mir-372	MI0000780	GUGGGCCUCAAAUGUGGAGCACUAUUCUGAUGUCCAAGUGGAAAGUGCUGCGACAUUUGAGCGUCAC	chr19:53787890-53787956(+)	MIPF0000068	mir-290	371a,372,373,371b	p@chr19:54290224..54290230,+	curation	-1.80573	0.286037	0.0390448	0.221078	10.2261	12.0319	876.81	480.855	209.597	2512.59	2973.38	135.143	590.646	699.188	503.337	996.962	17101.1	5234.18
hsa-miR-26b-5p	5p	MIMAT0000083	UUCAAGUAAUUCAGGAUAGGU	UCAAGU	21	Yes	Mature_miRNA	canonical_conserved_miRNA	hsa-mir-26b	MI0000084	CCGGGACCCAGUUCAAGUAAUUCAGGAUAGGUUGUGUGCUGUCCAGCCUGUUCUCCAUUACUUGGCUCGGGGACCGG	chr2:218402646-218402722(+)	MIPF0000043	mir-26	26b	p1@CTDSP1	NM_021198	-1.76061	0.295124	0.0440077	0.236054	10.0391	11.7998	570.199	1339.08	2465.03	520.004	399.137	1018.29	3920.49	5949.51	4414.45	5194.49	965.683	945.364
hsa-miR-155-5p	5p	MIMAT0000646	UUAAUGCUAAUCGUGAUAGGGGUU	UAAUGC	24	Yes	Mature_miRNA	canonical_conserved_miRNA	hsa-mir-155	MI0000681	CUGUUAAUGCUAAUCGUGAUAGGGGUUUUUGCCUCCAACUGACUCCUACAUAUUAGCAUUAACAG	chr21:25573980-25574044(+)	MIPF0000157	mir-155	155	p1@MIR155HG	NR_001458	-1.7587	0.295515	0.0465513	0.243769	9.38107	11.1398	209.127	398.481	2598.36	115.484	102.53	575.143	1561.72	665.457	705.737	10339.5	209.855	55.4737
